# Supplementary material for: An Integrative Glycomic Approach for Quantitative Meat Species Profiling
Source: MDPI journal article supplement (doi:10.3390/foods11131952), 2022-06-30
Supplement: s1 [file s1]

Supplementary Figures

Representative of N-glycan MS spectra

Chicken: HexNAc(2)Hex(3)  
1.0 $\pm$ 0.4% @ 7.63min

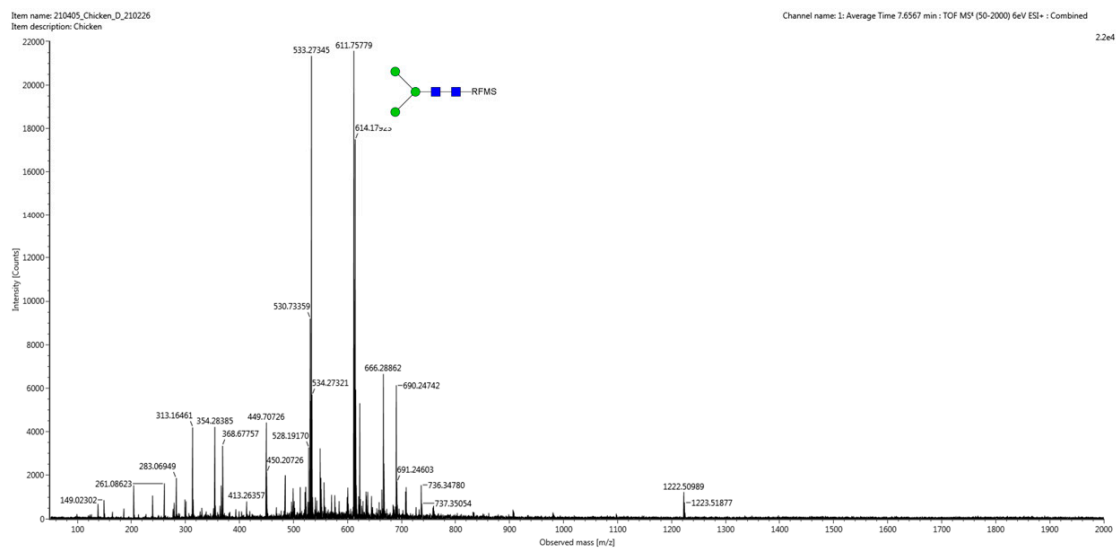

**Figure S1.** Chicken: HexNAc(2)Hex(3) 1.0  $\pm$  0.4%, 7.63 min.

# Chicken: HexNAc(2)Hex(4) 2.9±0.8% @ 9.93min

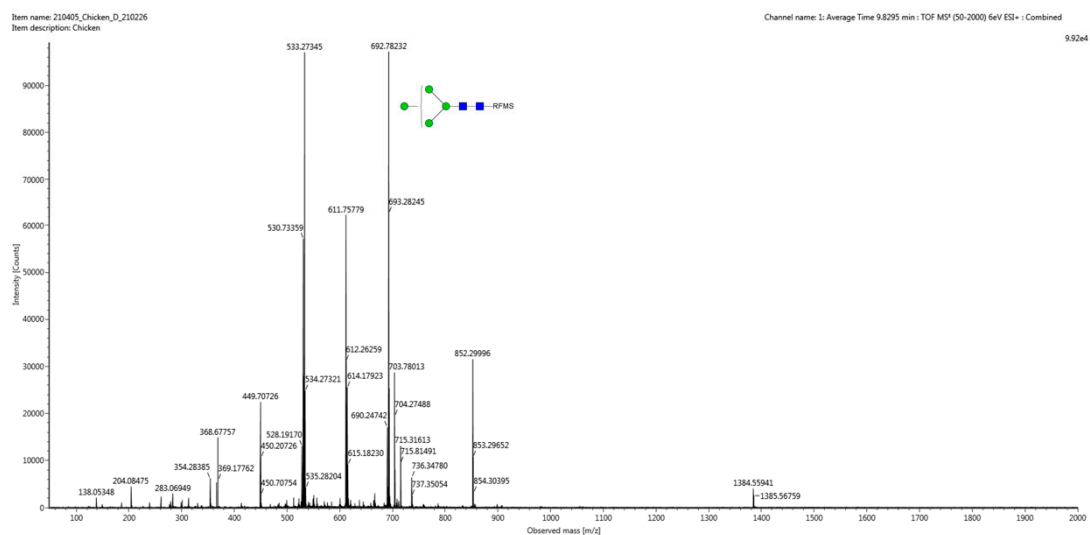

**Figure S2.** Chicken: HexNAc(2)Hex(4) 2.9 ± 0.8%, 9.93 min.

# Chicken: HexNAc(4)Hex(3)Fuc(1) 1.1±0.2% @ 11.48min

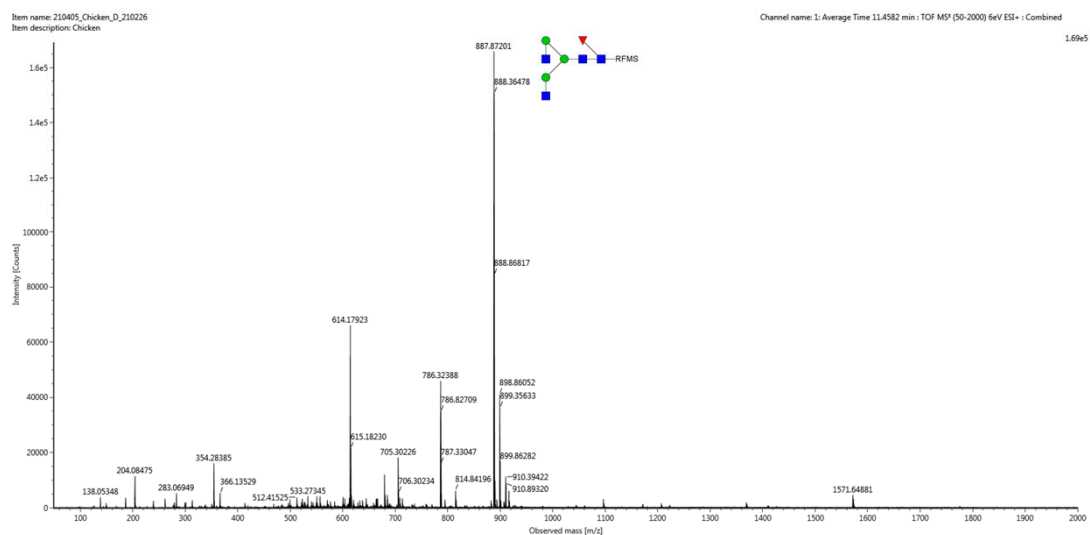

**Figure S3.** Chicken: HexNAc(4)Hex(3)Fuc(1) 1.1 ± 0.2%, 11.48 min.

# Chicken: HexNAc(2)Hex(5) 9.3±0.2% @ 12.89min

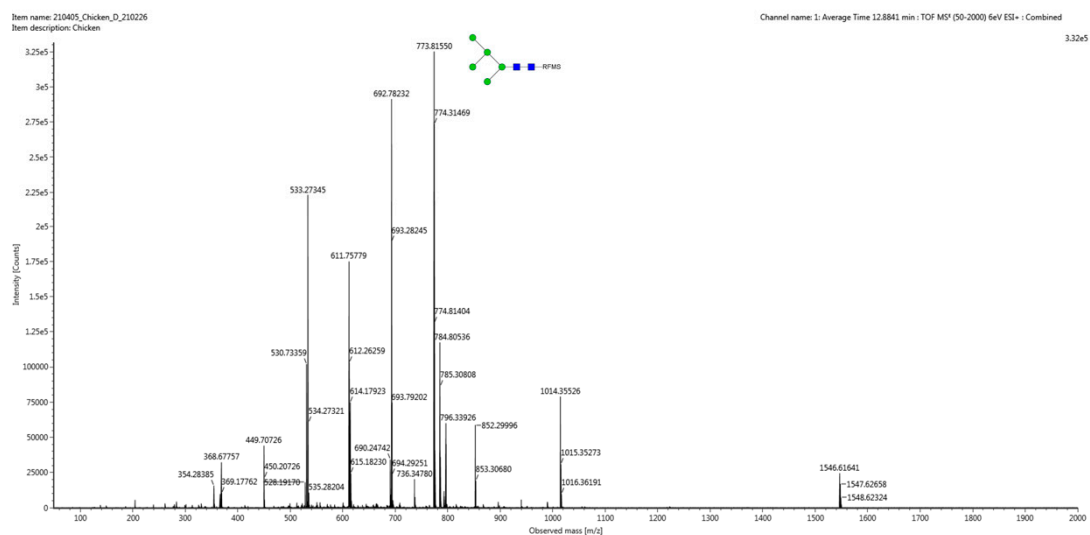

**Figure S4.** Chicken: HexNAc(2)Hex(5) 9.3 ± 0.2%, 12.89 min.

# Chicken: HexNAc(5)Hex(4)Fuc(1) 1.6±0.1% @ 14.47min

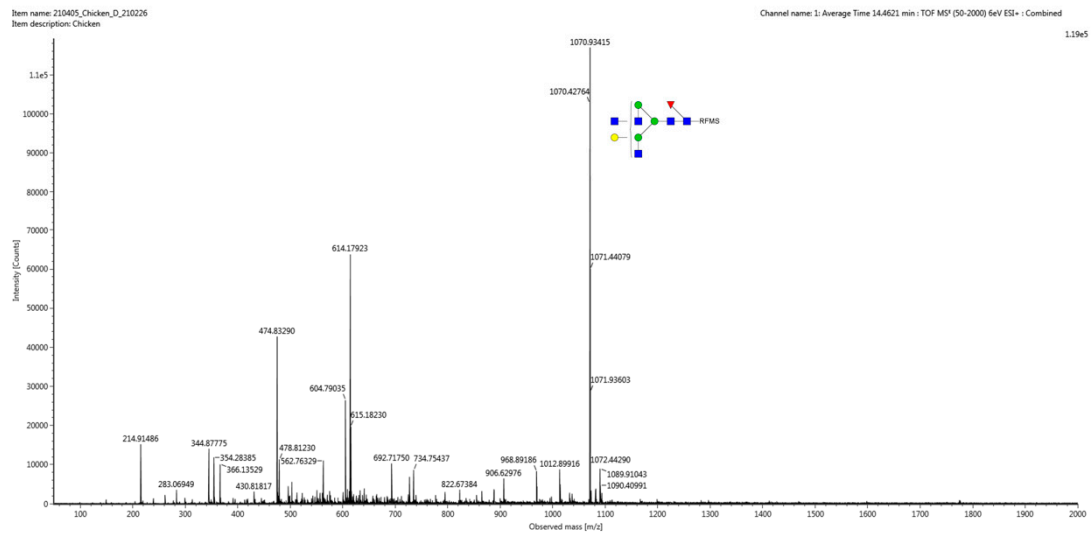

**Figure S5.** Chicken: HexNAc(5)Hex(4)Fuc(1) 1.6 ± 0.1%, 14.47 min.

# Chicken: HexNAc(4)Hex(5) 2.0±0.2% @ 15.57min

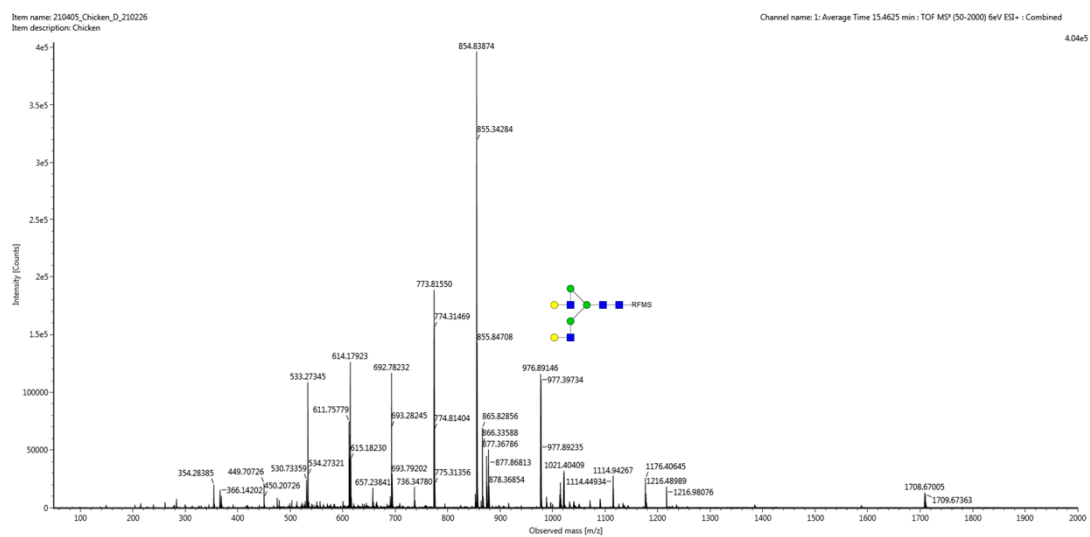

**Figure S6.** Chicken: HexNAc(4)Hex(5) 2.0 ± 0.2%, 15.57 min.

# Chicken: HexNAc(2)Hex(6) 8.1±0.8% @ 15.57min

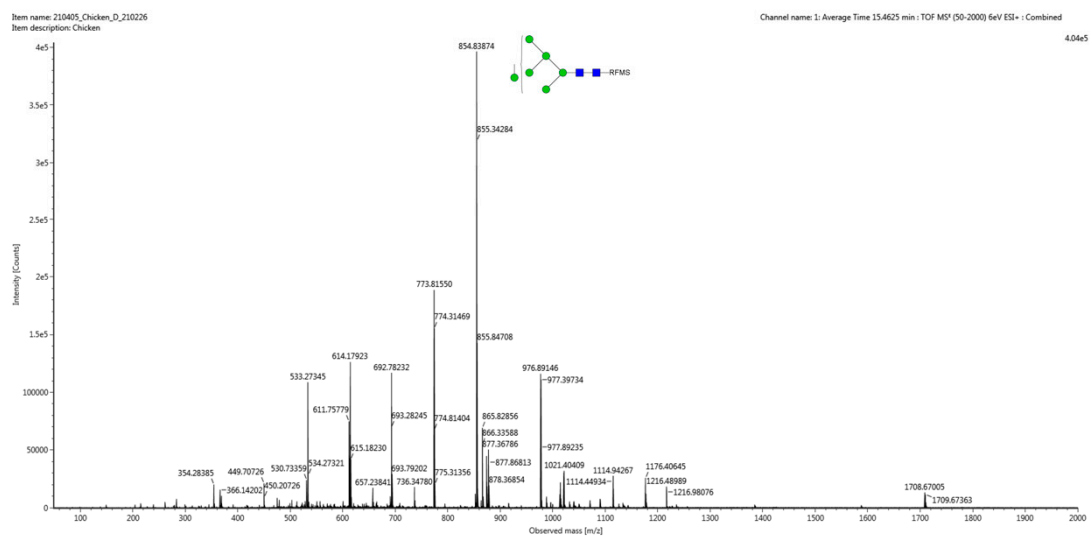

**Figure S7.** Chicken: HexNAc(2)Hex(6) 8.1 ± 0.8%, 15.57 min.

Chicken: HexNAc(4)Hex(5)Fuc(1)  
2.2±0.4% @ 16.29min

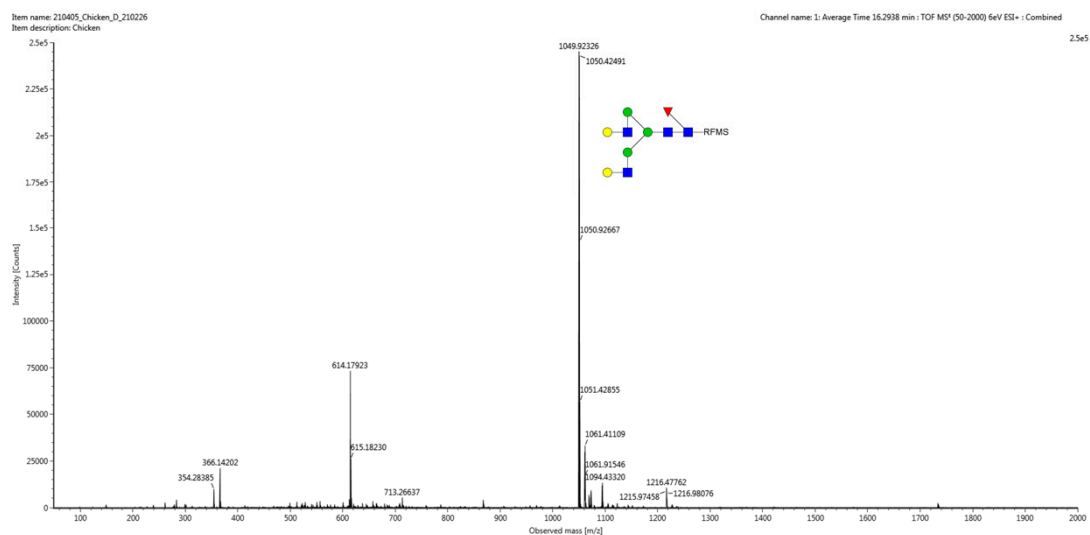

**Figure S8.** Chicken: HexNAc(4)Hex(5)Fuc(1) 2.2 ± 0.4%, 16.29 min.



# Chicken: HexNAc(5)Hex(5)Fuc(1) 5.9±0.5% @ 16.74min

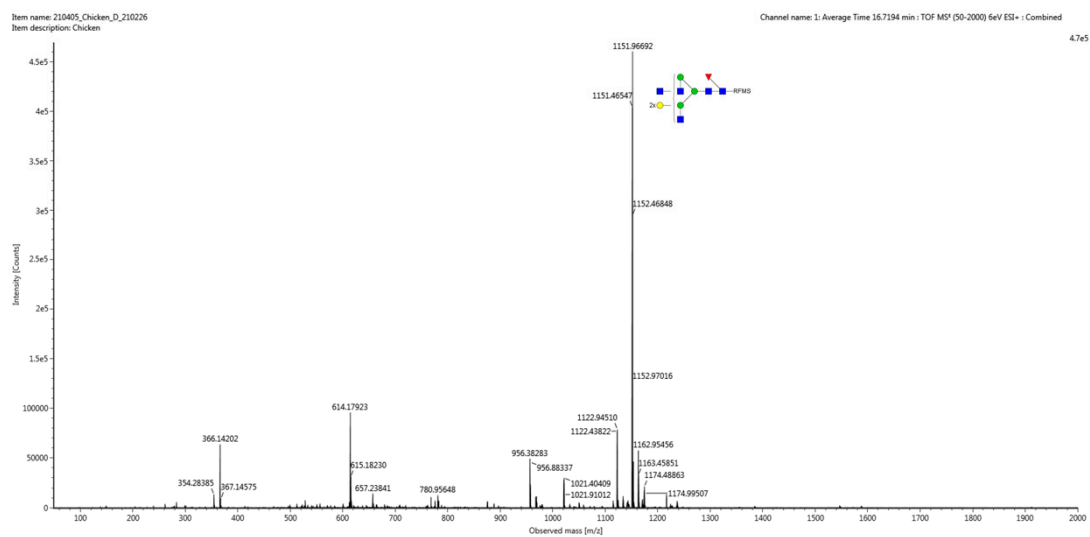

**Figure S9.** Chicken: HexNAc(5)Hex(5)Fuc(1) 5.9 ± 0.5%, 16.74 min.

# Chicken: HexNAc(4)Hex(5)NeuAc(1) 9.4±0.5% @ 17.49min

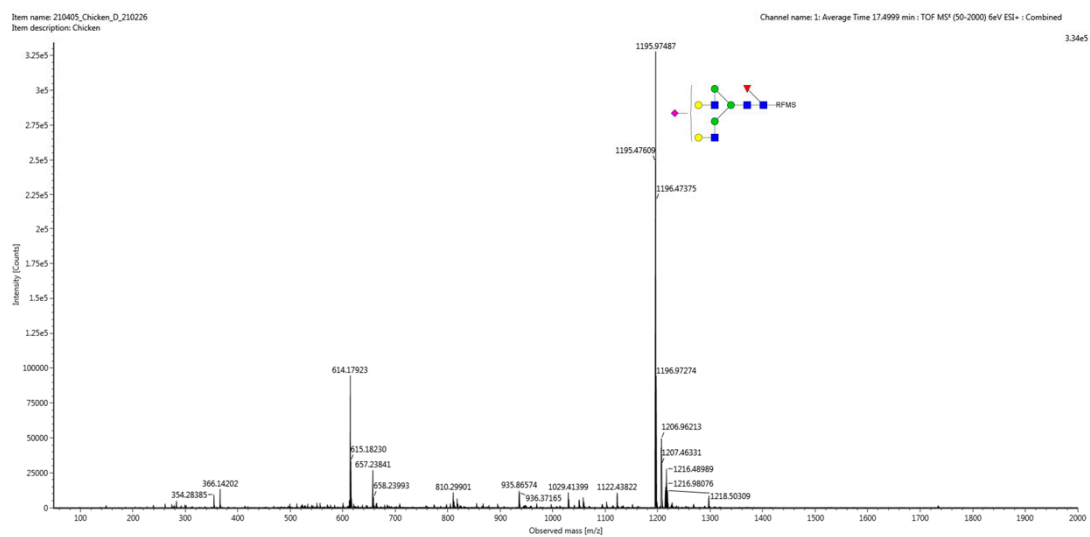

**Figure S10.** Chicken: HexNAc(4)Hex(5)Fuc(1) 9.4 ± 0.5%, 17.49 min.

# Chicken: HexNAc(4)Hex(5)Fuc(1)NeuAc(1) 6.2±0.6% @ 17.98min

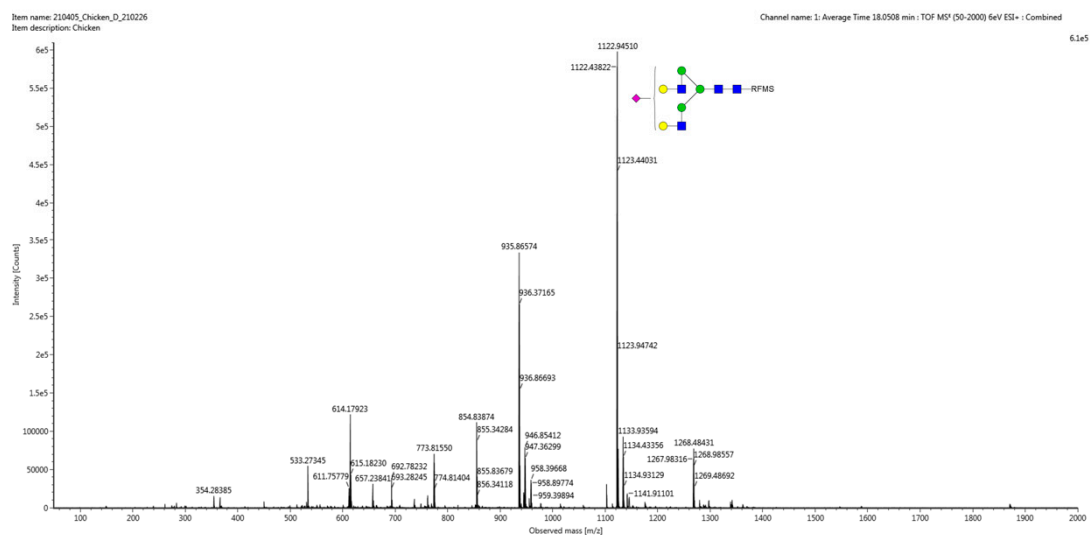

**Figure S11.** Chicken: HexNAc(4)Hex(5)Fuc(1)NeuAc(1) 6.2 ± 0.6%, 17.98 min.

# Chicken: HexNAc(2)Hex(7)

6.6±0.6% @ 18.14min

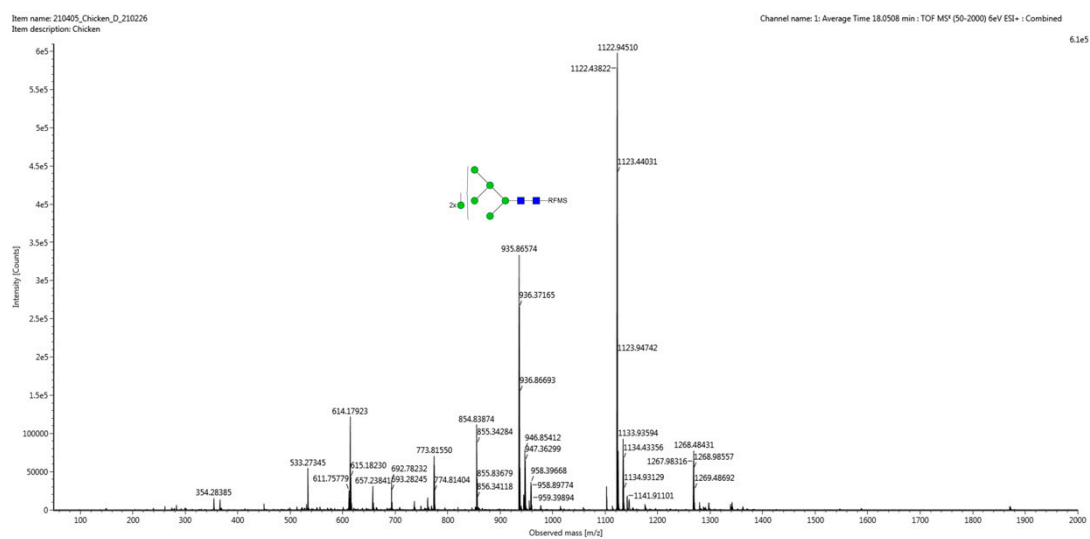

**Figure S12.** Chicken: HexNAc(2)Hex(7) 6.6 ± 0.6%, 18.14 min.

Chicken: HexNAc(4)Hex(5)Fuc(1)NeuAc(2)  
4.3±0.5% @ 18.67min

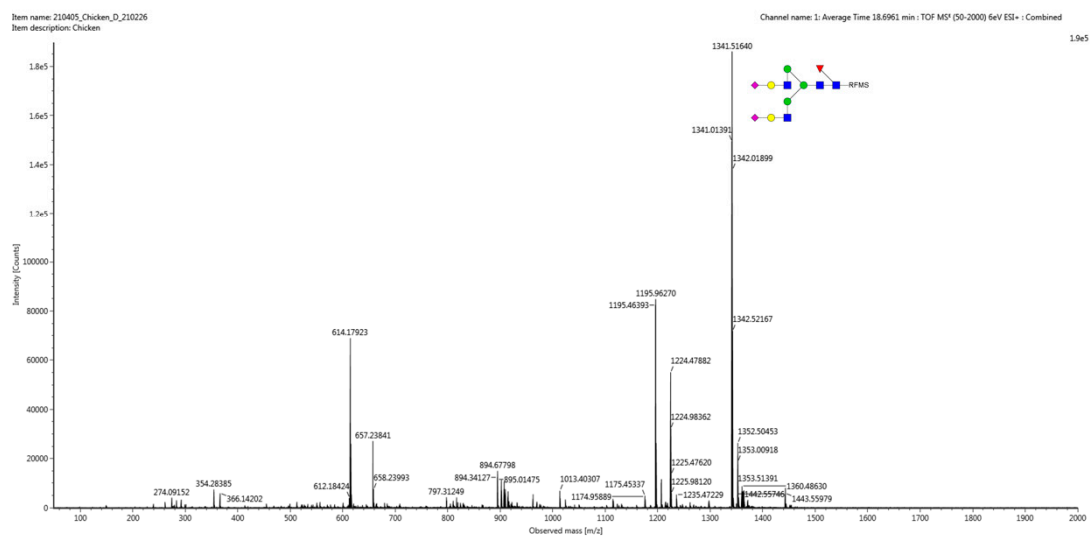

**Figure S13.** Chicken: HexNAc(4)Hex(5)Fuc(1)NeuAc(2) 4.3 ± 0.5%, 18.67 min.

# Chicken: HexNAc(5)Hex(5)Fuc(1)NeuAc(1) 6.0±0.3% @ 19.27min

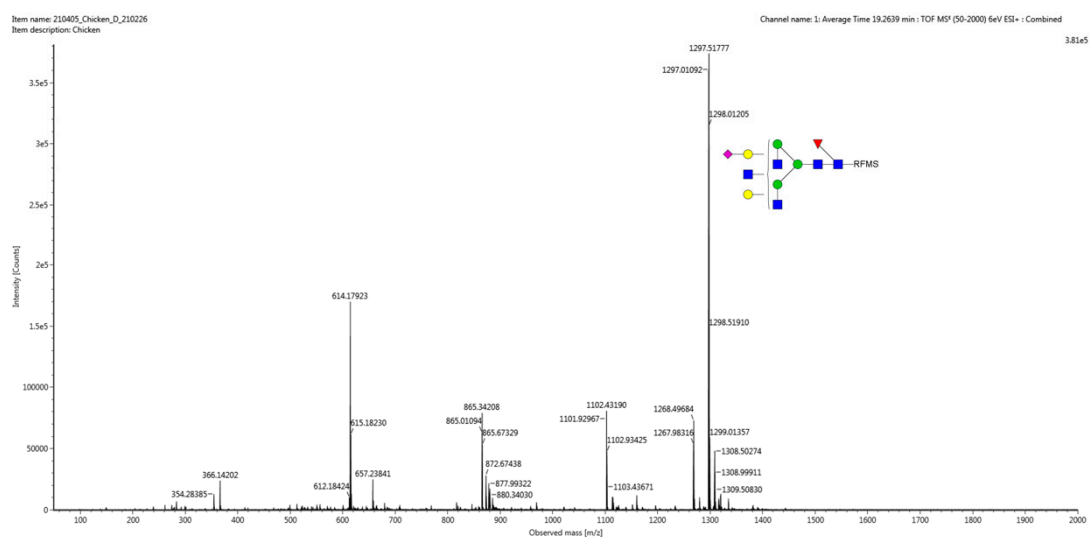

**Figure S14.** Chicken: HexNAc(5)Hex(5)Fuc(1)NeuAc(1) 6.0 ± 0.3%, 19.27 min.

# Chicken: HexNAc(4)Hex(5)NeuAc(2) 11.9±1.0% @ 20.2min

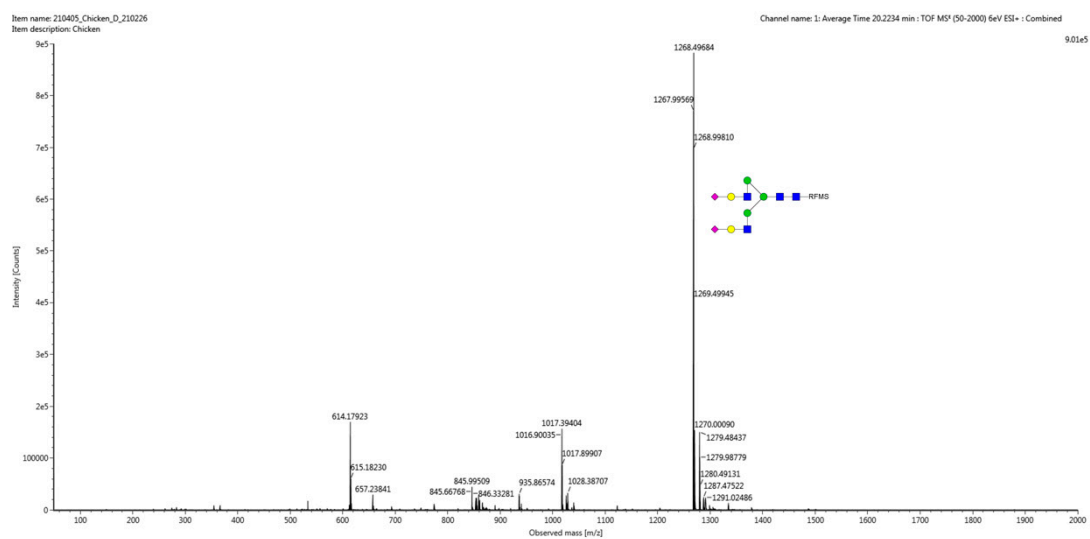

**Figure S15.** Chicken: HexNAc(4)Hex(5)NeuAc(2) 11.9 ± 1.0%, 20.2 min.

# Chicken: HexNAc(2)Hex(8) 10.8±1.1% @ 20.51min

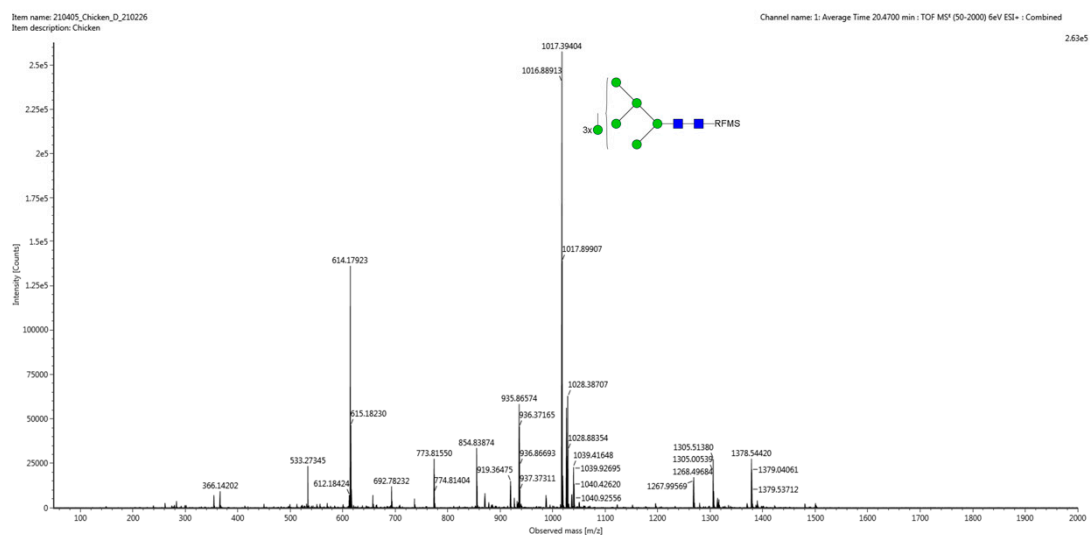

**Figure S16.** Chicken: HexNAc(2)Hex(8) 10.8 ± 1.1%, 20.51 min.



# Chicken: HexNAc(2)Hex(9) 9.2±0.7% @ 22.31min

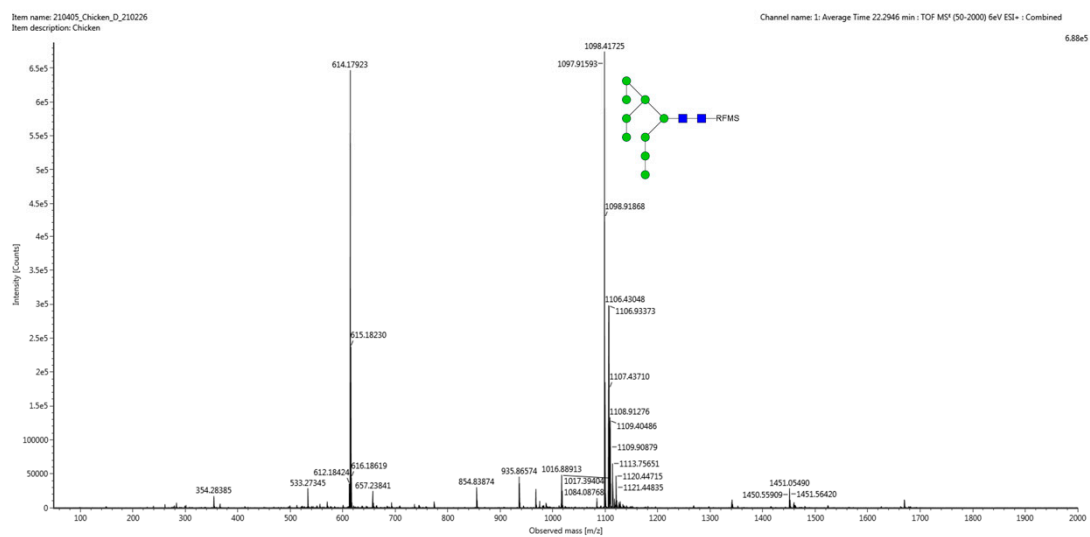

Pork: HexNAc(2)Hex(3)  
 $0.3 \pm 0.3\%$  @ 7.6min

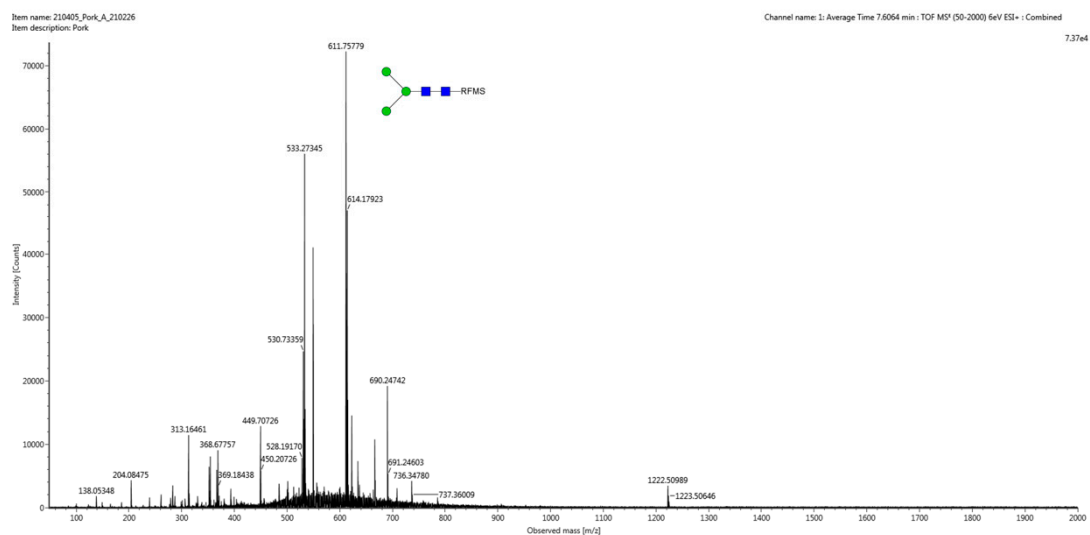

**Figure S18.** Pork: HexNAc(2)Hex(3)  $0.3 \pm 0.3\%$ , 7.6 min.

Pork: HexNAc(2)Hex(4)  
0.5±0.5% @ 9.91min

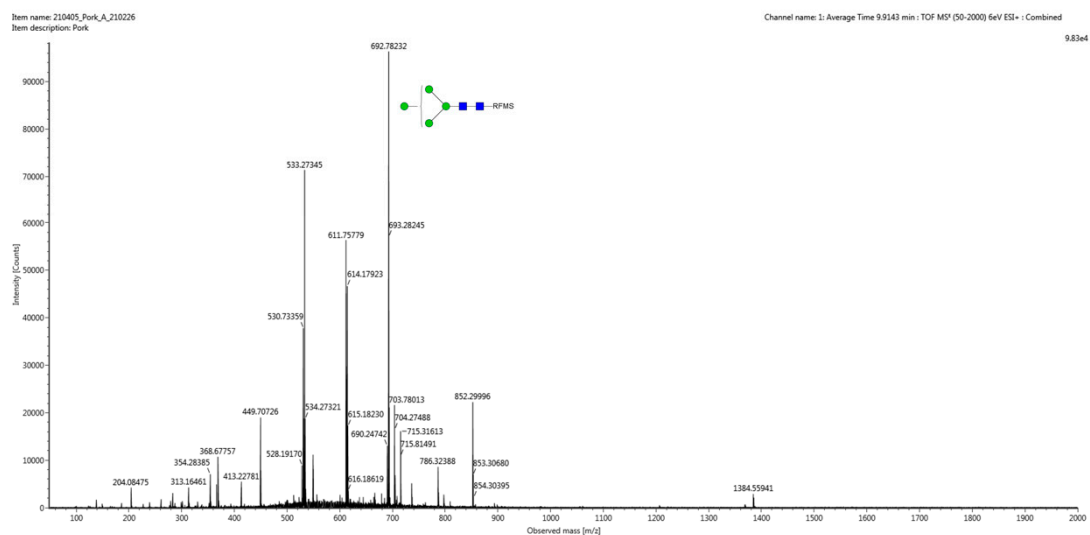

Figure S19. Pork: HexNAc(2)Hex(4) 0.5 ± 0.5%, 9.91 min.

Pork: HexNAc(4)Hex(3)Fuc(1)  
6.3±0.2% @ 11.46min

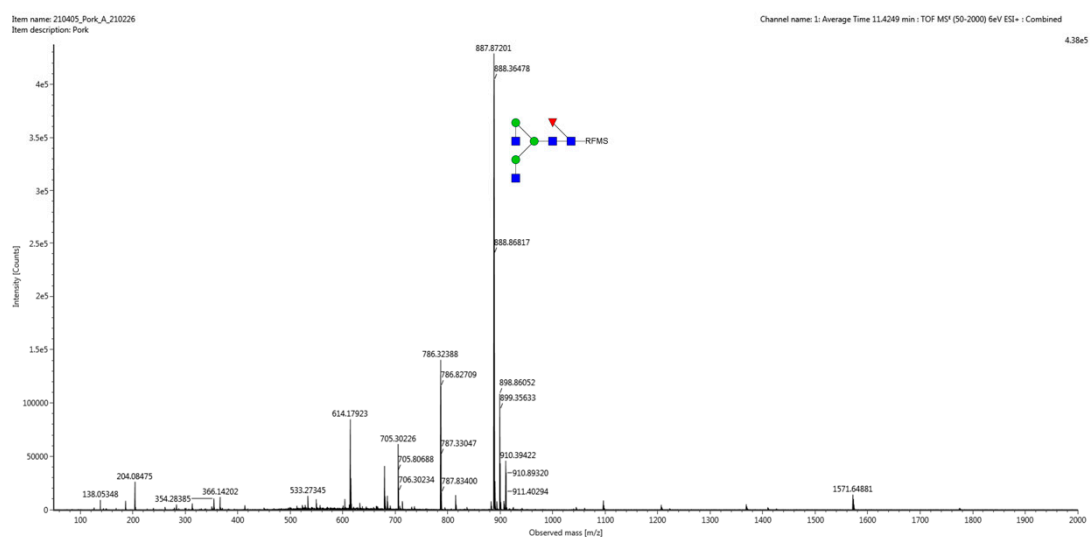

**Figure S20.** Pork: HexNAc(4)Hex(3)Fuc(1) 6.3 ± 0.2%, 11.46 min.

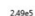

**Figure S21.** Pork: HexNAc(2)Hex(5)Fuc  $4.3 \pm 0.5\%$ , 12.87 min.

# Pork: HexNAc(4)Hex(4)Fuc(1) 1.2±0.4% @ 13.7min 14.07min

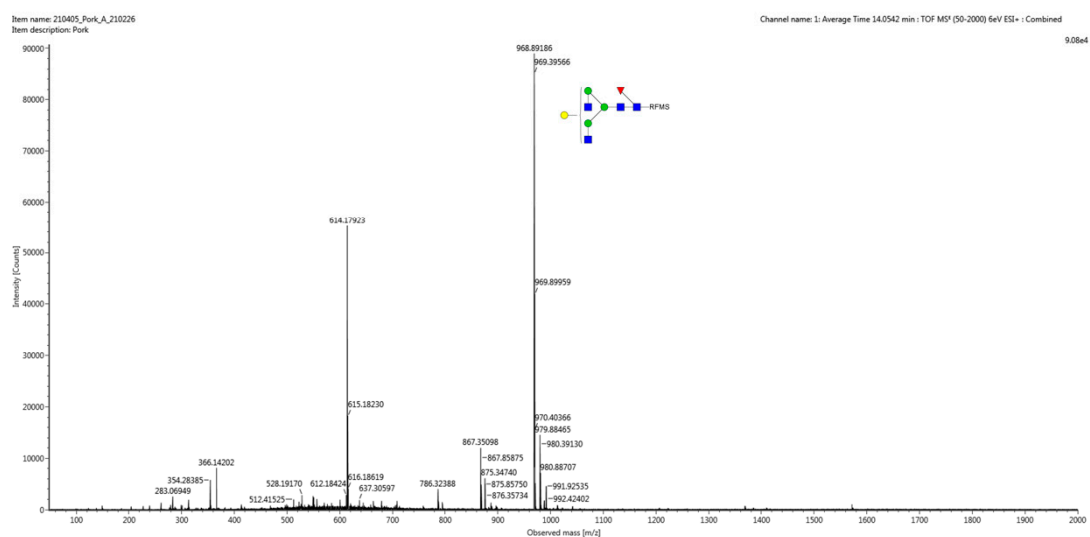

**Figure S22.** Pork: HexNAc(4)Hex(4)Fuc(1) 1.2 ± 0.4%, 13.7 min, 14.07 min.

# Pork: HexNAc(4)Hex(5) 0.3±0.1% @ 15.55min

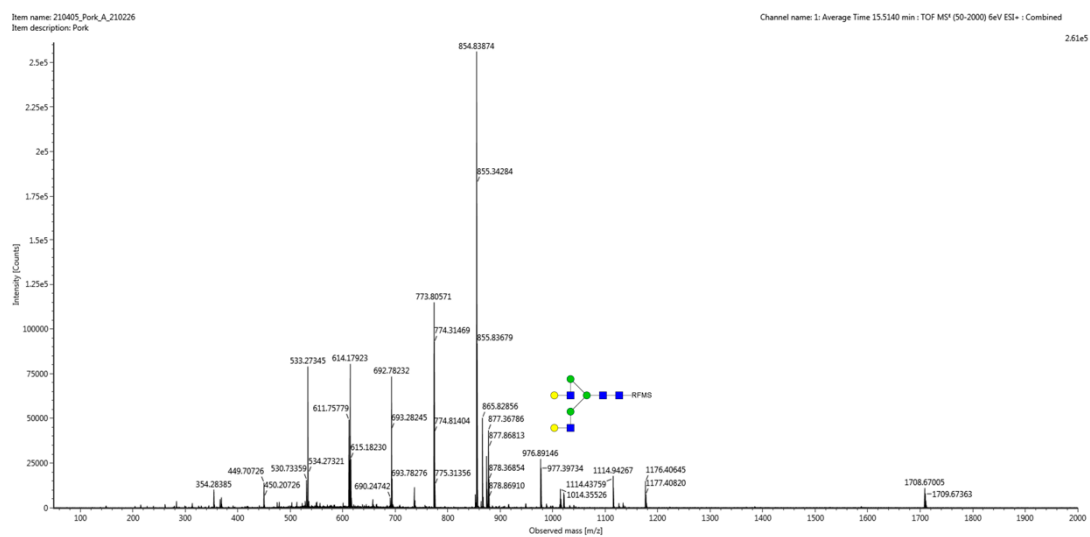

**Figure S23.** Pork: HexNAc(4)Hex(5) 0.3 ± 0.1%, 15.55 min.

Pork: HexNAc(2)Hex(6)  
4.5±1.0% @ 15.55min

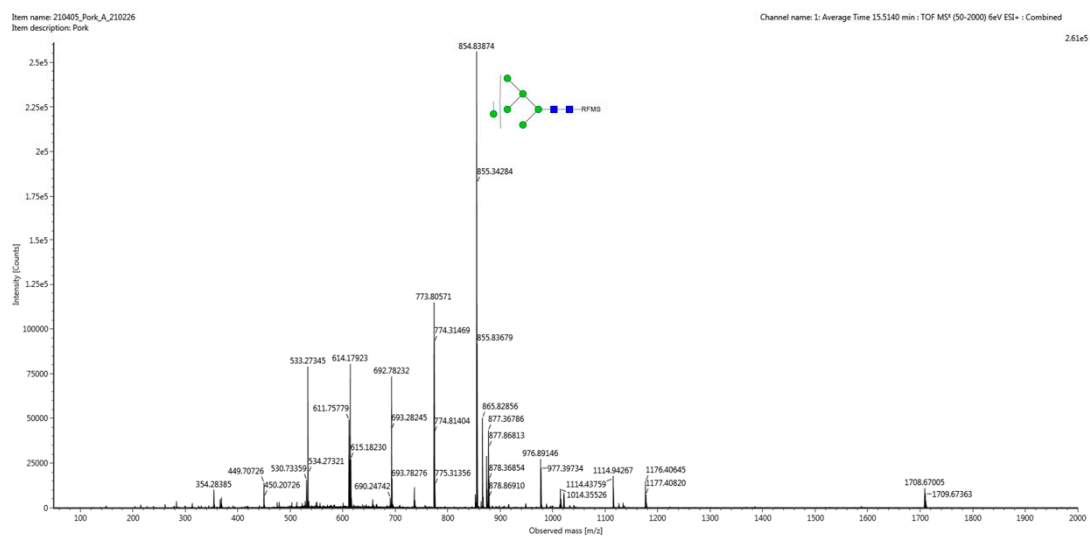

**Figure S24.** Pork: HexNAc(2)Hex(6) 4.5 ± 1.0%, 15.55 min.



# Pork: HexNAc(4)Hex(5)Fuc(1)NeuAc(1) 0.2±0.2% @ 17.46min

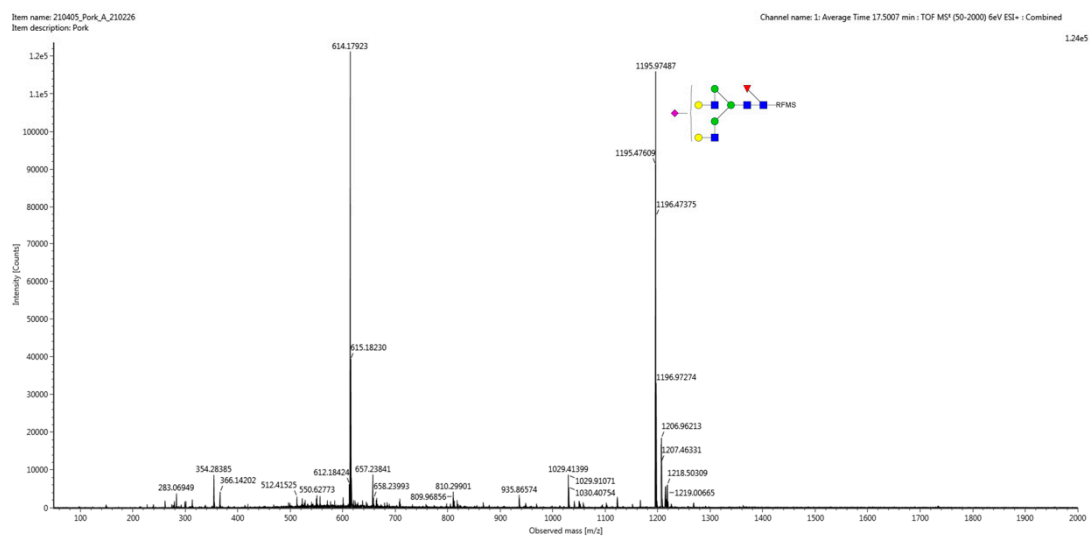

**Figure S25.** Pork: HexNAc(4)Hex(3)Fuc(1)NeuAc(1) 0.2 ± 0.2%, 17.46 min.

# Pork: HexNAc(2)Hex(7) 3.9±0.6% @ 18.07min

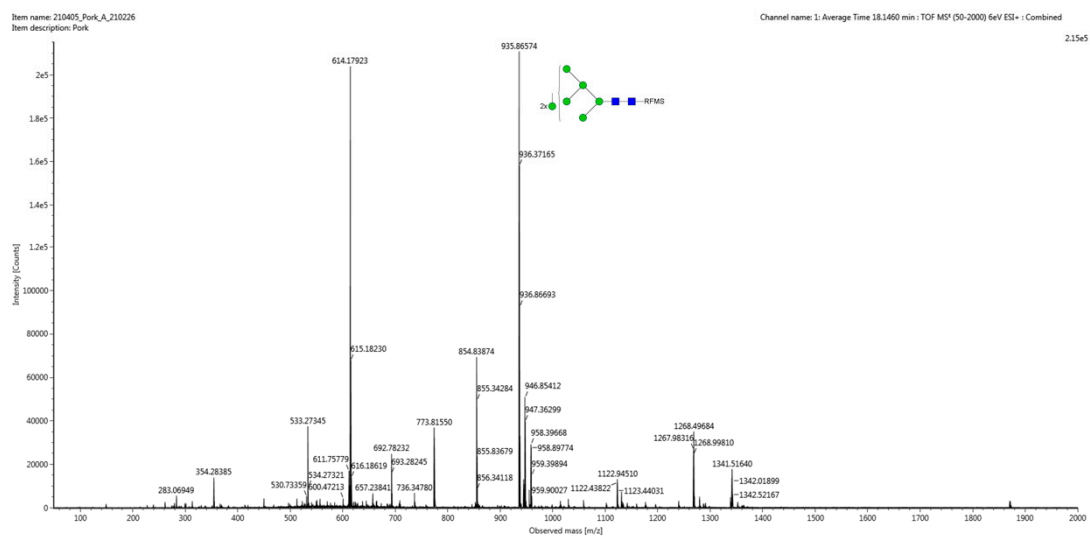

**Figure S26.** Pork: HexNAc(2)Hex(7) 3.9 ± 0.6%, 18.07 min.

Pork: HexNAc(4)Hex(5)Fuc(1)NeuAc(2)  
60.7±6.3% @ 18.64min

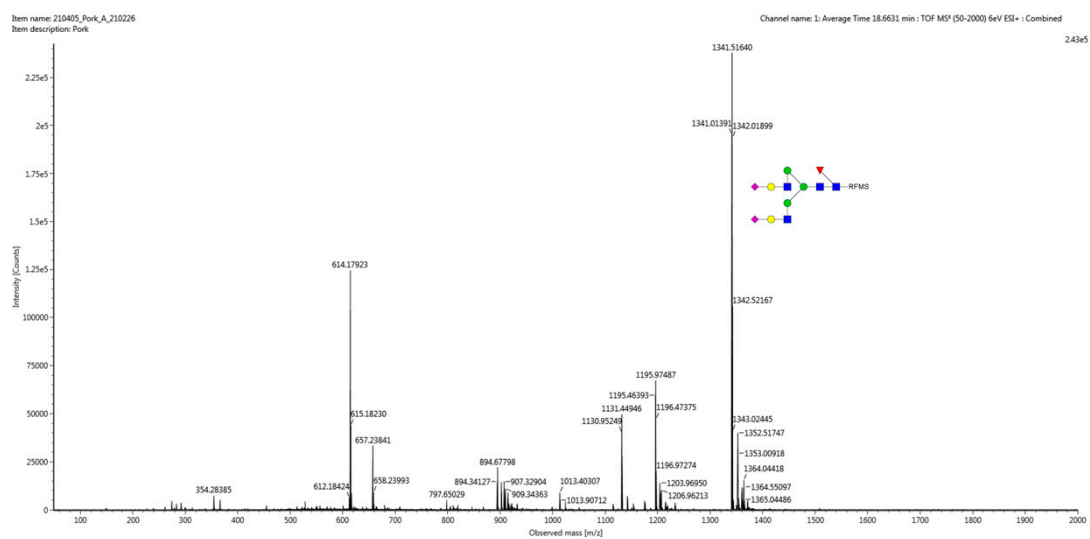

**Figure S27.** Pork: HexNAc(4)Hex(5)Fuc(1)NeuAc(2) 60.7 ± 6.3%, 18.64 min.

Pork: HexNAc(4)Hex(6)Fuc(1)NeuAc(1)  
1.2±0.5% @ 19.47min

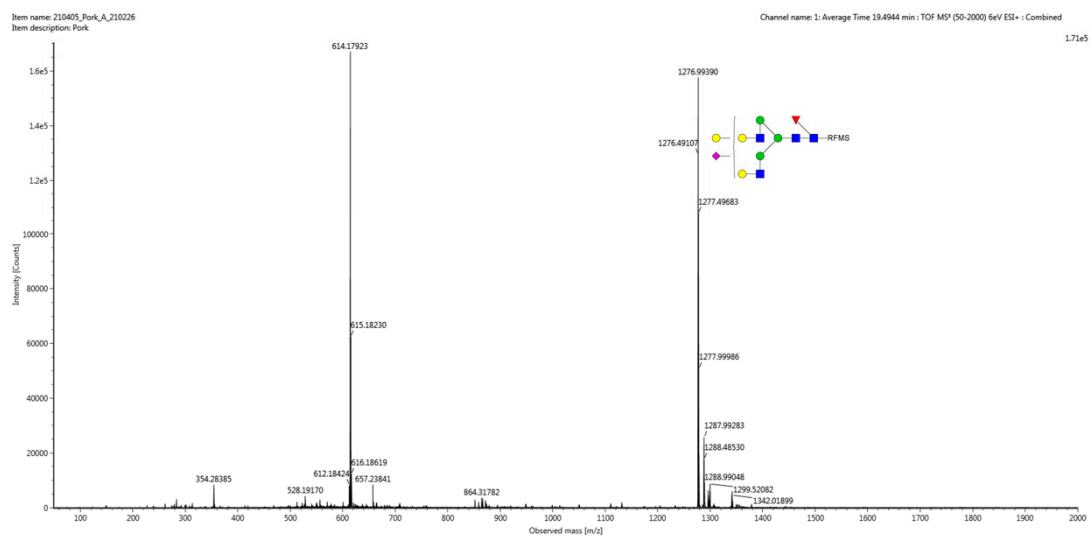

**Figure S28.** Pork: HexNAc(4)Hex(6)Fuc(1)NeuAc(1) 1.2 ± 0.5%, 19.47 min.

Pork: HexNAc(4)Hex(5)NeuAc(2)  
2.3±0.2% @ 20.19min

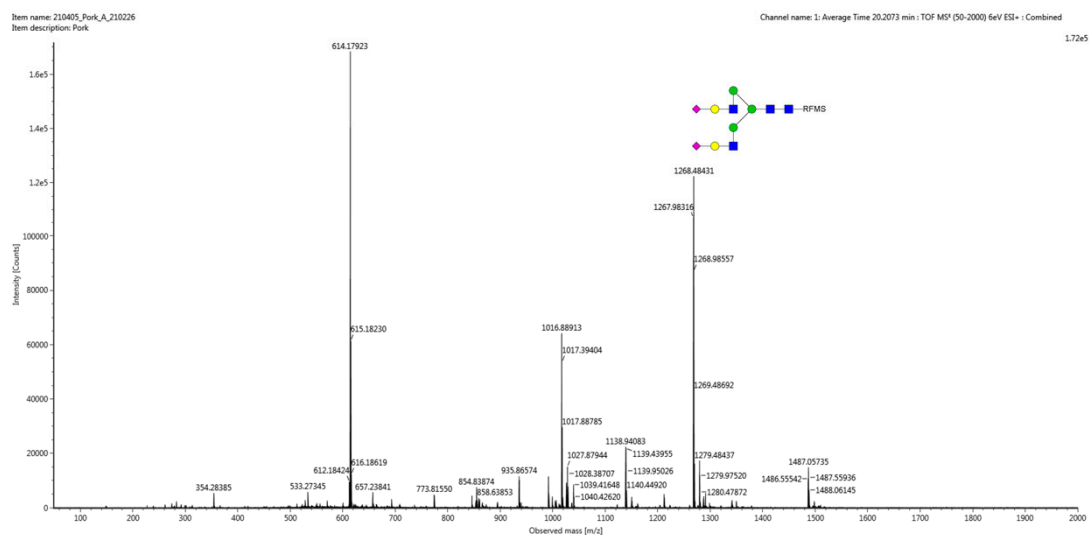

**Figure S29.** Pork: HexNAc(4)Hex(5)NeuAc(2) 2.3 ± 0.2%, 20.19 min.

# Pork: HexNAc(2)Hex(8) 2.2±1.4% @ 20.48min

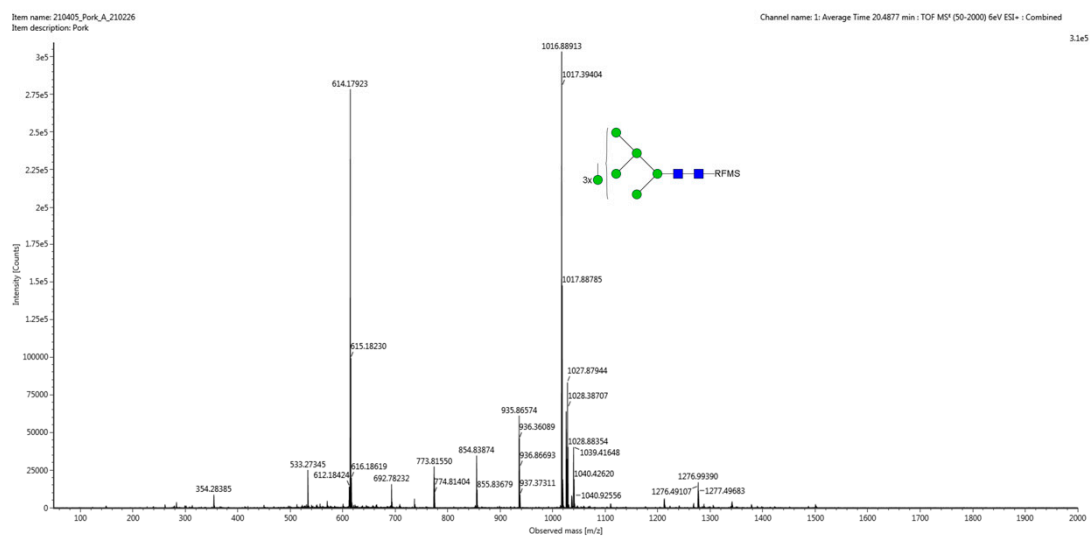

**Figure S30.** Pork: HexNAc(2)Hex(8) 2.2 ± 1.4%, 20.48 min.

Pork: HexNAc(4)Hex(7)NeuAc(1)  
3.3±0.3% @ 20.8min

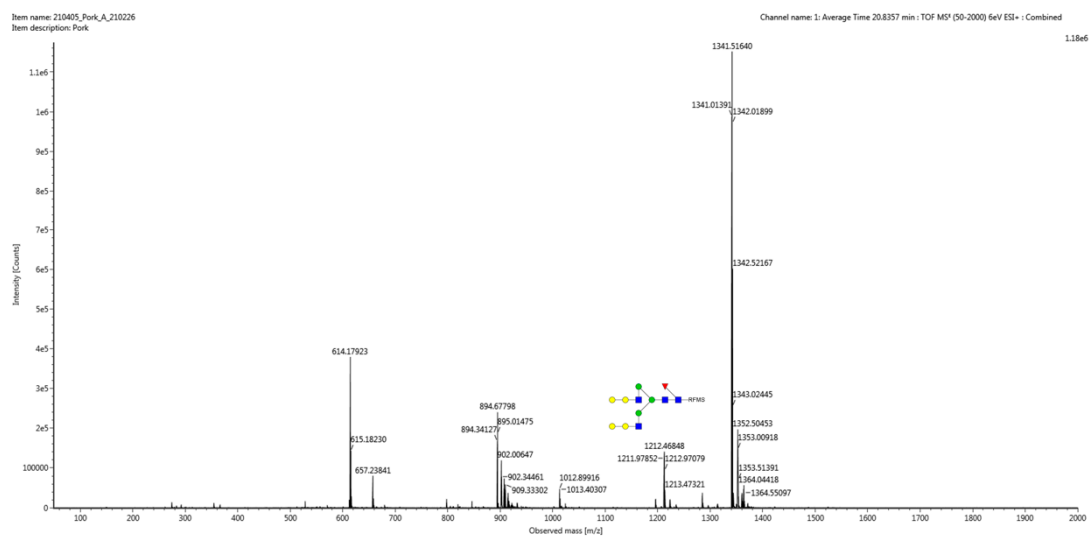

**Figure S31.** Pork: HexNAc(4)Hex(7)NeuAc(1) 3.3 ± 0.3%, 20.8 min.

Pork: HexNAc(4)Hex(6)Fuc(1)NeuAc(1)  
60.7±6.3% @ 20.8min

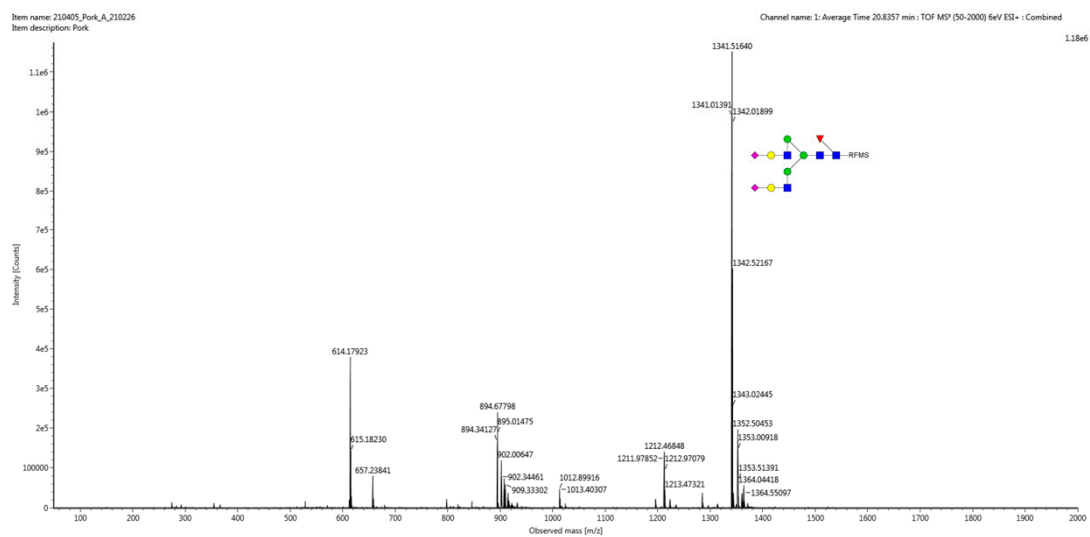

**Figure S32.** Pork: HexNAc(4)Hex(6)Fuc(1)NeuAc(1) 60.7 ± 6.3%, 20.8 min.



Pork: HexNAc(4)Hex(7)NeuAc(1)  
1.1±0.1% @ 20.8min

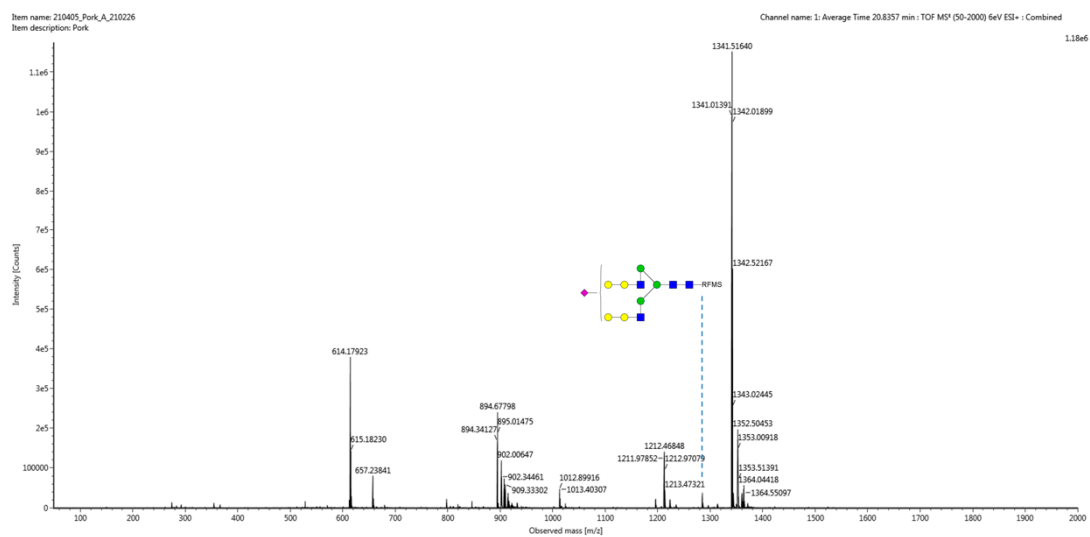

**Figure S33.** Pork: HexNAc(4)Hex(7)NeuAc(1) 1.1 ± 0.1%, 20.8 min.

# Pork: HexNAc(4)Hex(5)Fuc(1)NeuAc(1)NeuGc(1) 4.9±0.3% @ 21.93min

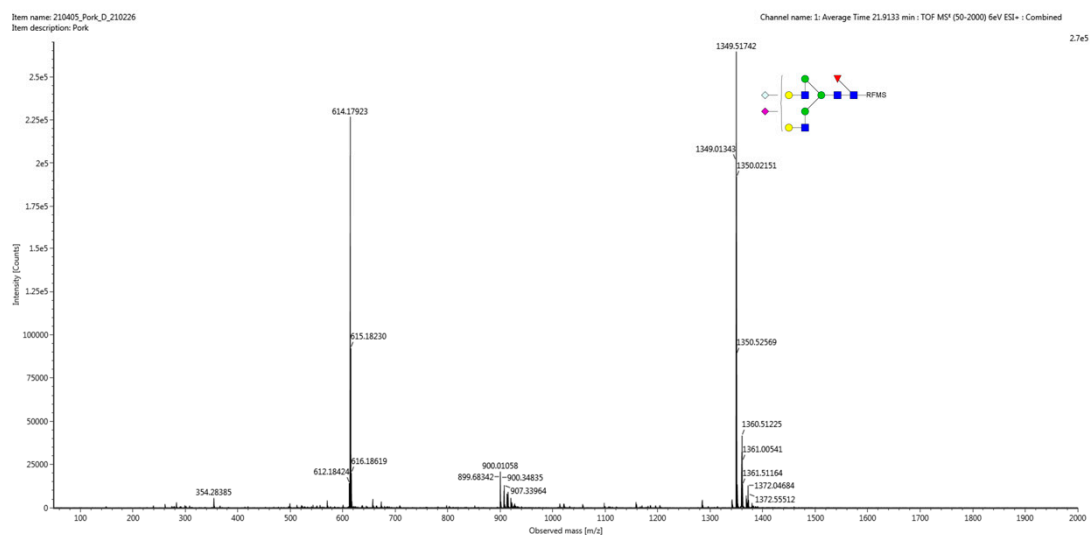

**Figure S34.** Pork: HexNAc(4)Hex(5)Fuc(1)NeuAc(1) 4.9 ± 0.3%, 21.93 min.

# Pork: HexNAc(2)Hex(9) 2.3±1.4% @ 22.26min

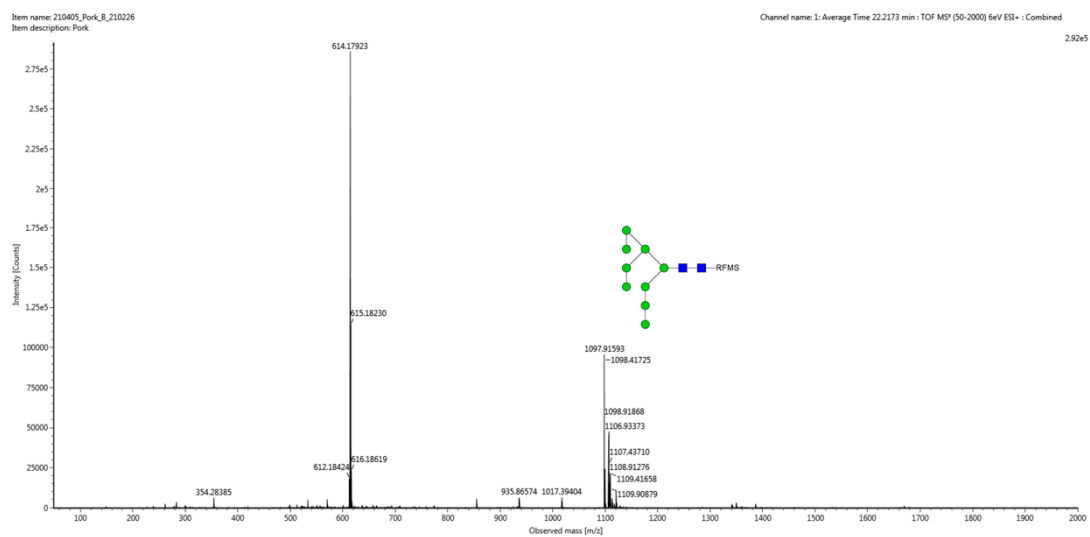

**Figure S35.** Pork: HexNAc(2)Hex(9) 2.3 ± 1.4%, 22.26 min.

Beef: HexNAc(2)Hex(4)  
1.0±1.0% @ 9.89min

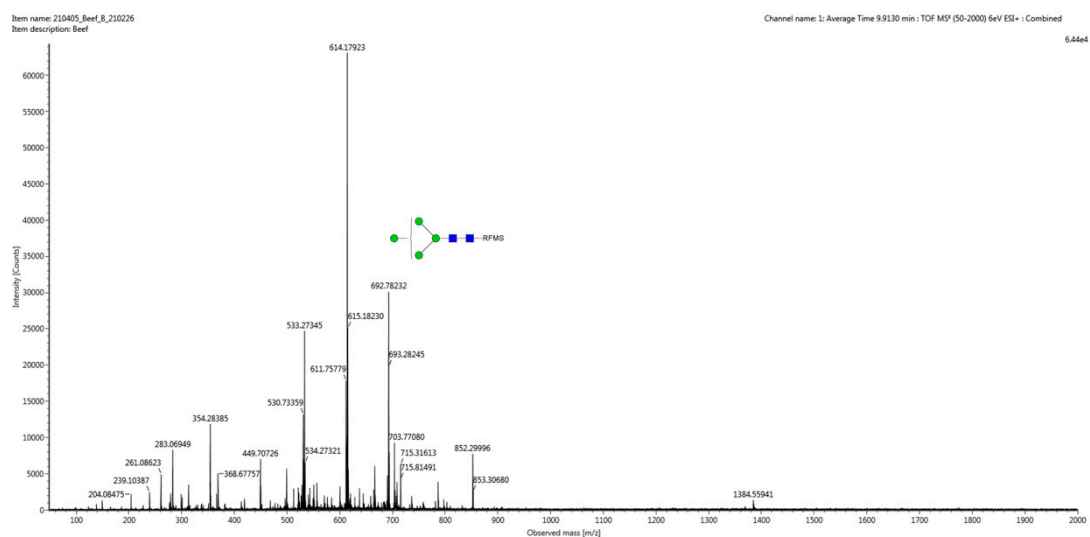

**Figure S36.** Beef: HexNAc(2)Hex(4)  $1.0 \pm 1.0\%$ , 9.89 min.

Beef: HexNAc(4)Hex(3)Fuc(1)  
0.8±0.5% @ 11.46min

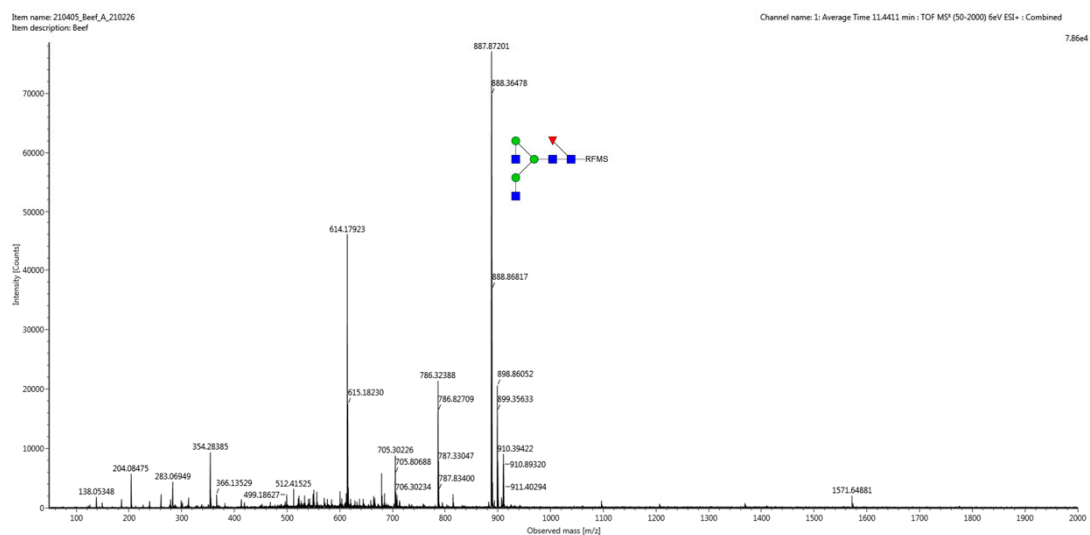

**Figure S37.** Beef: HexNAc(4)Hex(3)Fuc(1) 0.8 ± 0.5%, 11.46 min.

# Beef: HexNAc(2)Hex(5) 5.8±0.3% @ 12.87min

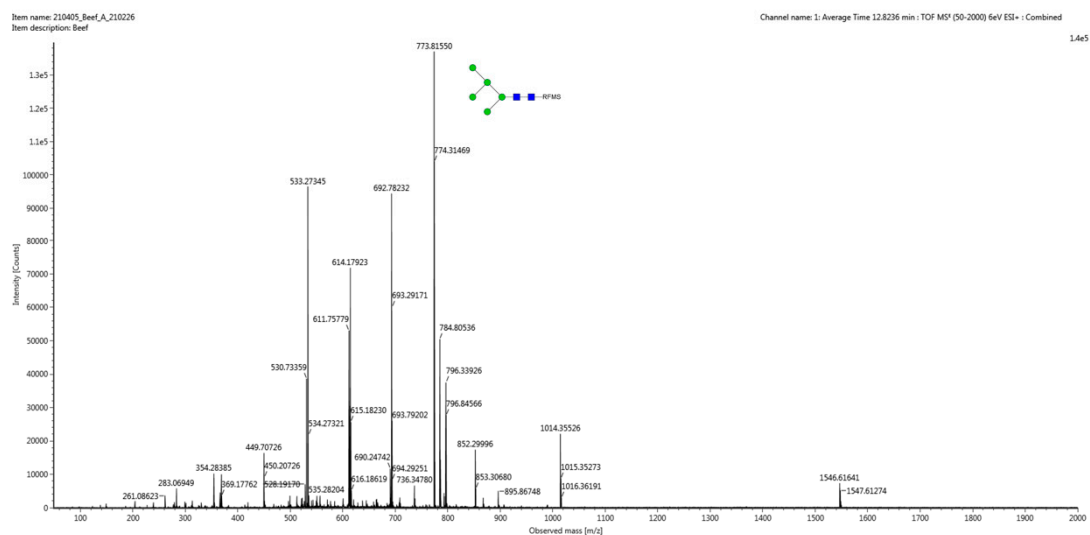

**Figure S38.** Beef: HexNAc(2)Hex(5) 5.8 ± 0.3%, 12.87 min.

Beef: HexNAc(4)Hex(4)Fuc(1)  
1.8±1.4% @ 14.06min

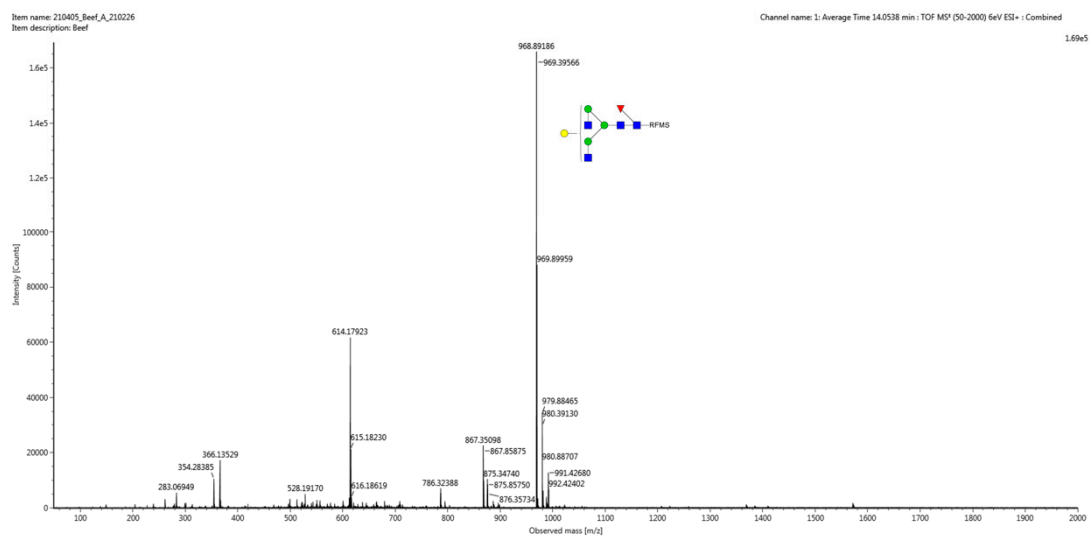

**Figure S39.** Beef: HexNAc(4)Hex(4)Fuc(1) 1.8 ± 1.4%, 14.06 min.

# Beef: HexNAc(2)Hex(6) 4.1±1.4% @ 15.58min

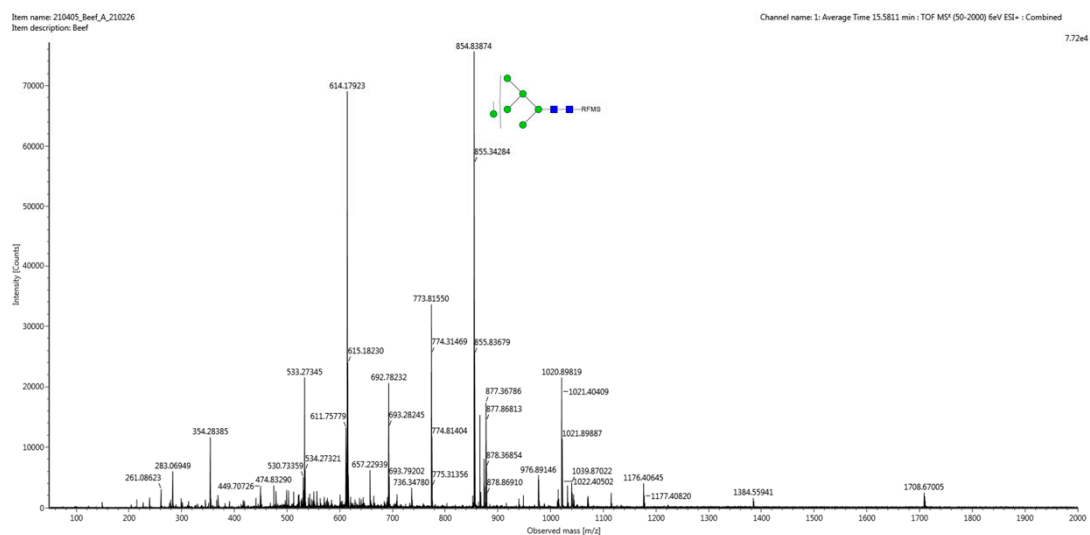

**Figure S40.** Beef: HexNAc(2)Hex(6) 4.1 ± 1.4%, 15.58 min.



# Beef: HexNAc(4)Hex(5)Fuc(1) 2.5±0.5% @ 16.27min

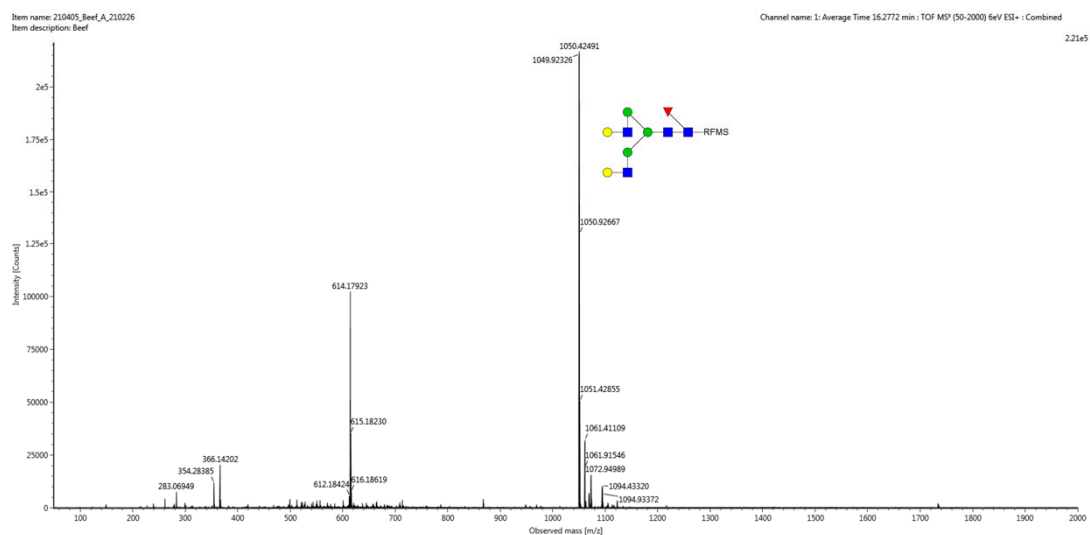

**Figure S41.** Beef: HexNAc(4)Hex(5)Fuc(1) 2.5 ± 0.5%, 16.27 min.

# Beef: HexNAc(2)Hex(7) 4.1±0.9% @ 18.1min

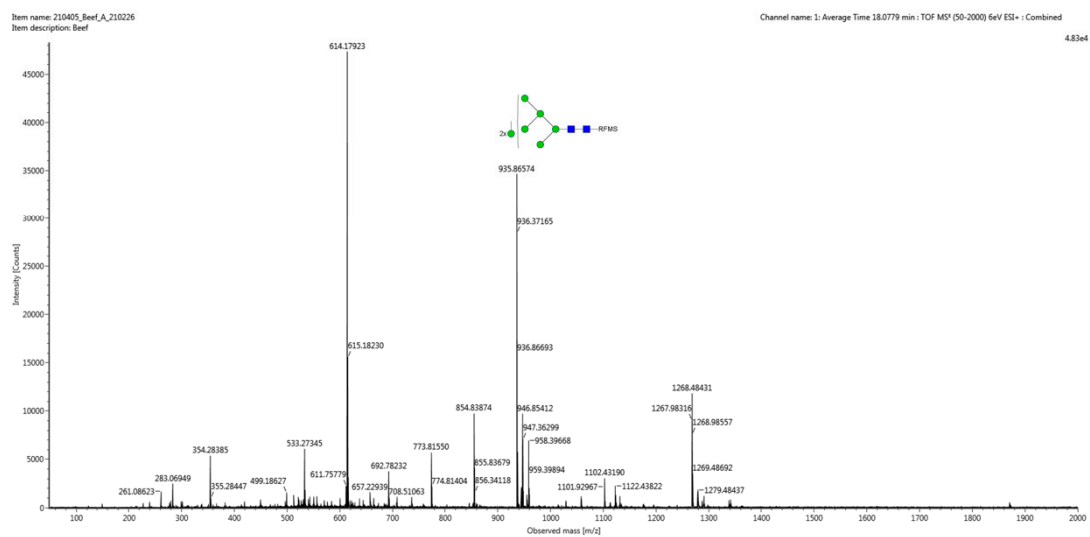

**Figure S42.** Beef: HexNAc(2)Hex(7) 4.1 ± 0.9%, 18.1 min.

Beef: HexNAc(4)Hex(5)Fuc(1)NeuAc(2)  
4.6±0.1% @ 18.67min

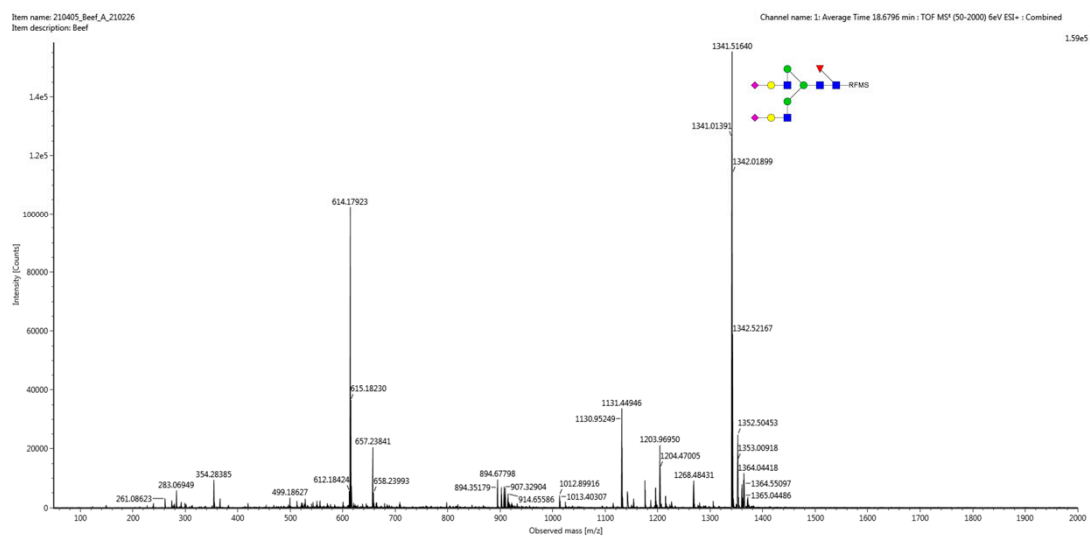

**Figure S43.** Beef: HexNAc(4)Hex(5)Fuc(1)NeuAc(2) 4.6 ± 0.1%, 18.67 min.

Beef: HexNAc(4)Hex(5)NeuAc(2)  
9.7±1.0% @ 19.12min

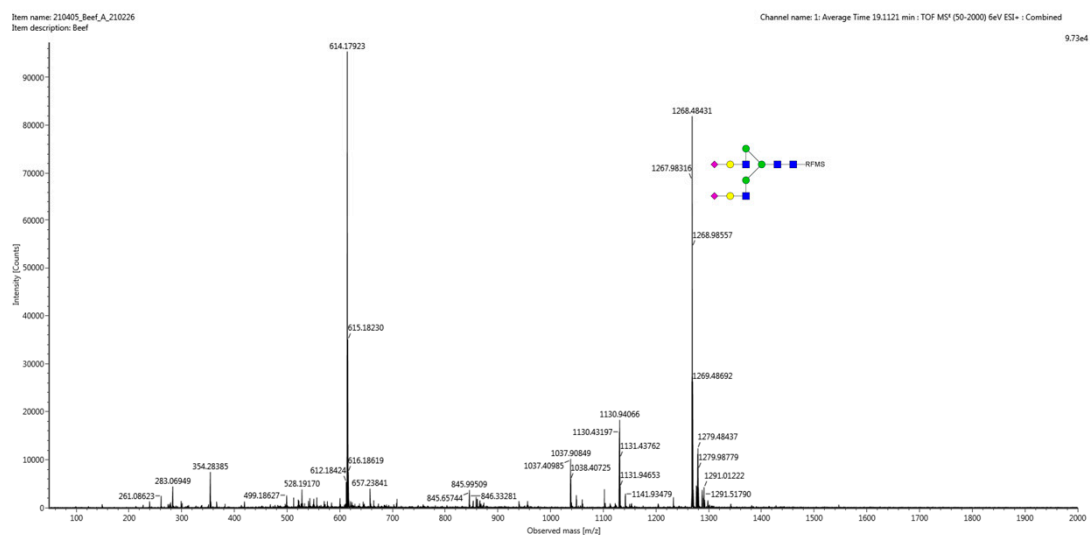

**Figure S44.** Beef: HexNAc(4)Hex(5)NeuAc(2) 9.7 ± 1.0%, 19.12 min.

Beef: HexNAc(4)Hex(6)Fuc(1)NeuAc(1)  
8.1±0.7% @ 19.5min

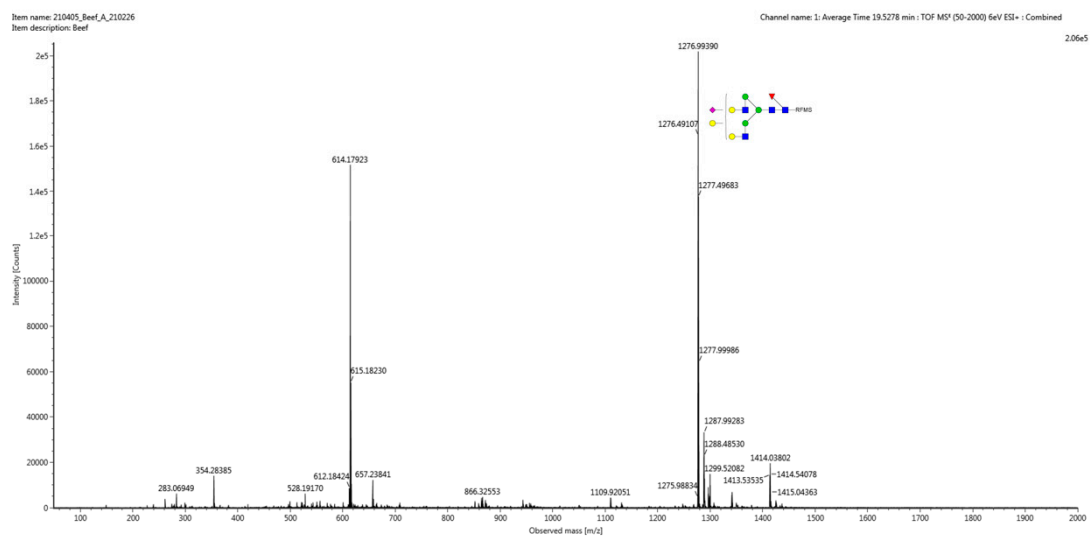

**Figure S45.** Beef: HexNAc(4)Hex(6)Fuc(1)NeuAc(1) 8.1 ± 0.7%, 19.5 min.

Beef: HexNAc(4)Hex(5)NeuAc(2)  
9.7±1.0% @ 20.2min

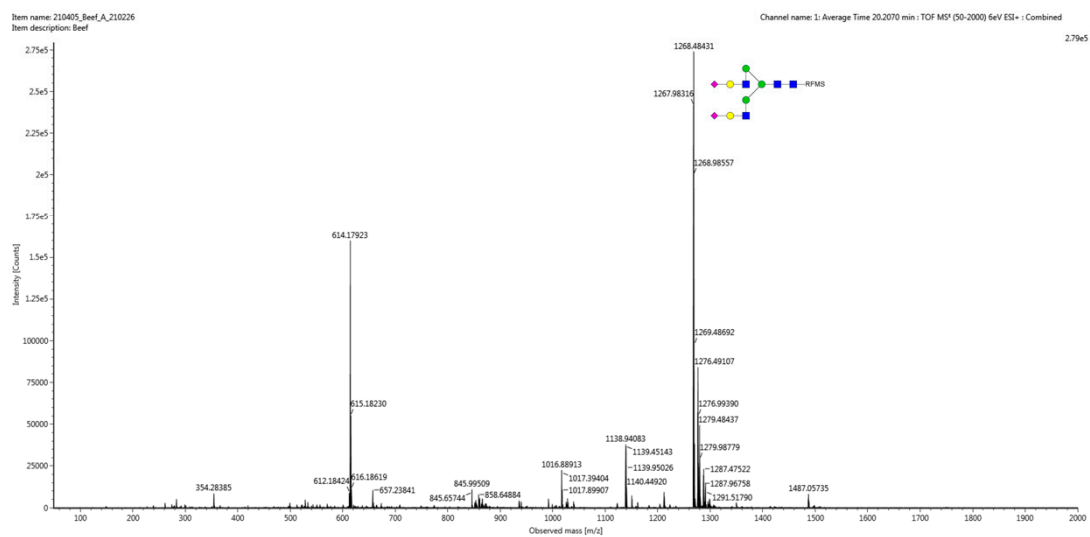

**Figure S46.** Beef: HexNAc(4)Hex(5)NeuAc(2) 9.7 ± 1.0%, 20.2 min.

# Beef: HexNAc(2)Hex(8)

0.6±0.1% @ 20.2min

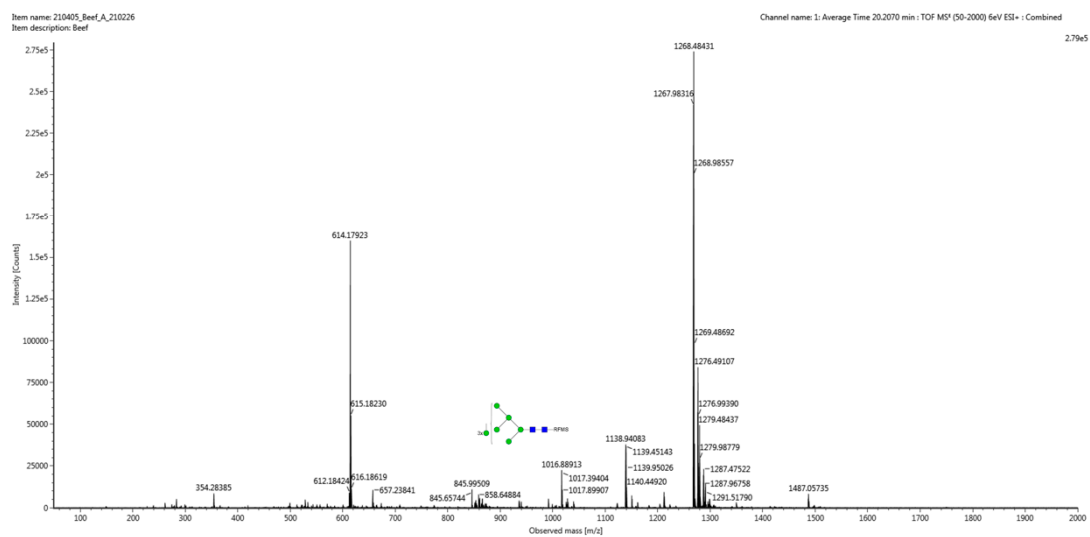

Figure S47. Beef: HexNAc(2)Hex(8) 0.6 ± 0.1%, 20.2 min.

# Beef: HexNAc(4)Hex(7)Fuc(1) 17.8±1.3% @ 20.73min 20.82min

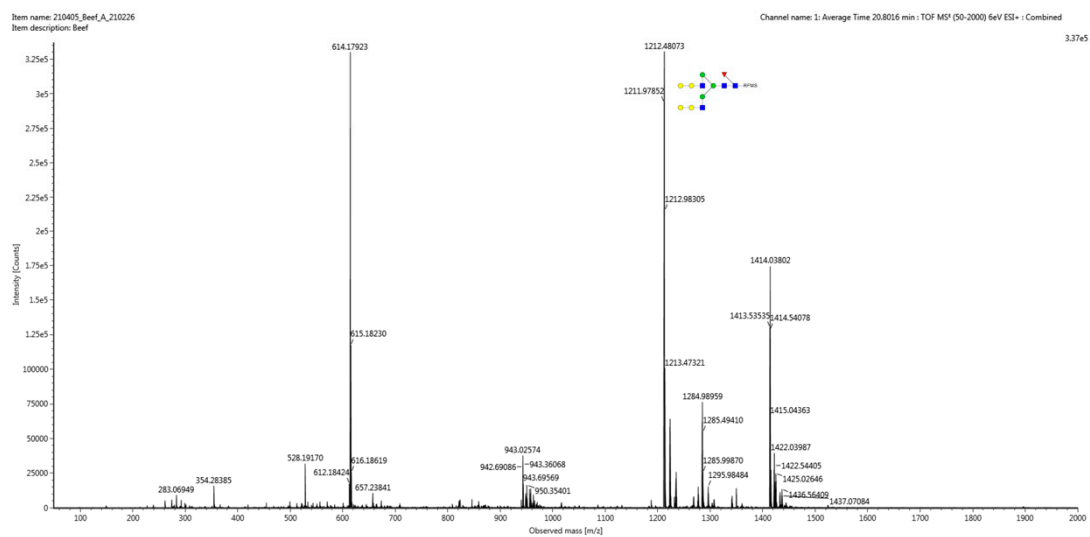

**Figure S48.** Beef: HexNAc(4)Hex(7)Fuc(1) 17.8 ± 1.3%, 20.73 min, 20.82 min.



Beef: HexNAc(4)Hex(5)NeuAc(1)NeuGc(1)  
18.5±1.4% @ 21.53min

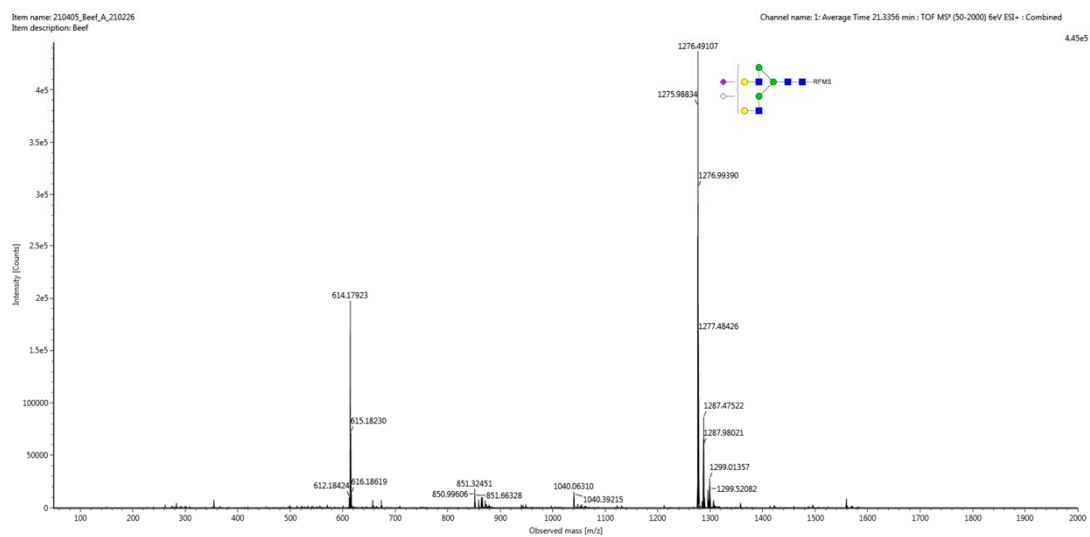

**Figure S49.** Beef: HexNAc(4)Hex(5)Fuc(1)NeuGC(1) 18.5 ± 1.4%, 21.53 min.

Beef: HexNAc(4)Hex(7)NeuAc(1)  
2.3±0.2% @ 21.76min

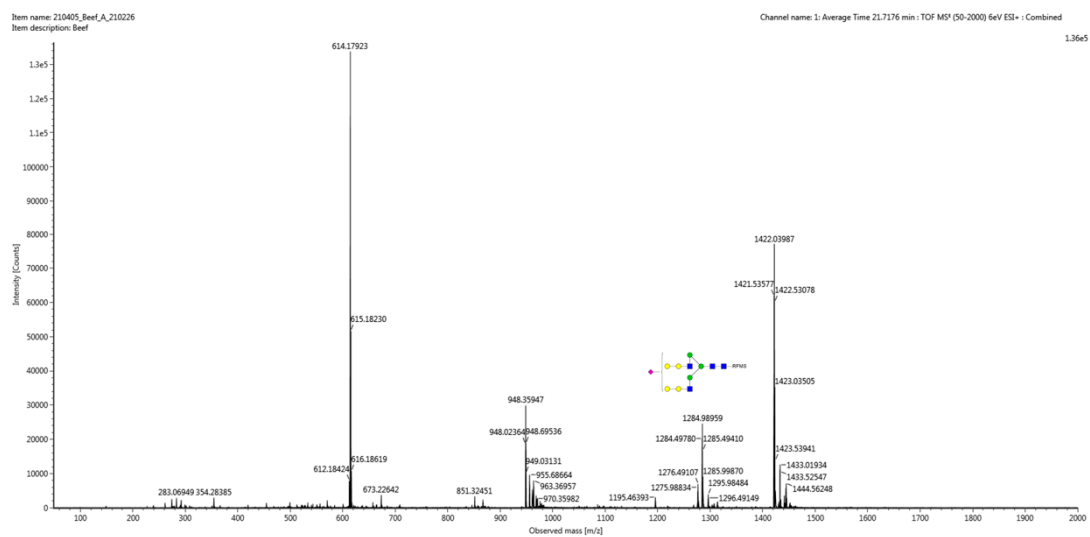

**Figure S50.** Beef: HexNAc(4)Hex(7)NeuAc(1) 2.3 ± 0.2%, 21.76 min.

Beef: HexNAc(4)Hex(6)Fuc(1)NeuGc(1)  
4.2±0.4% @ 21.76min

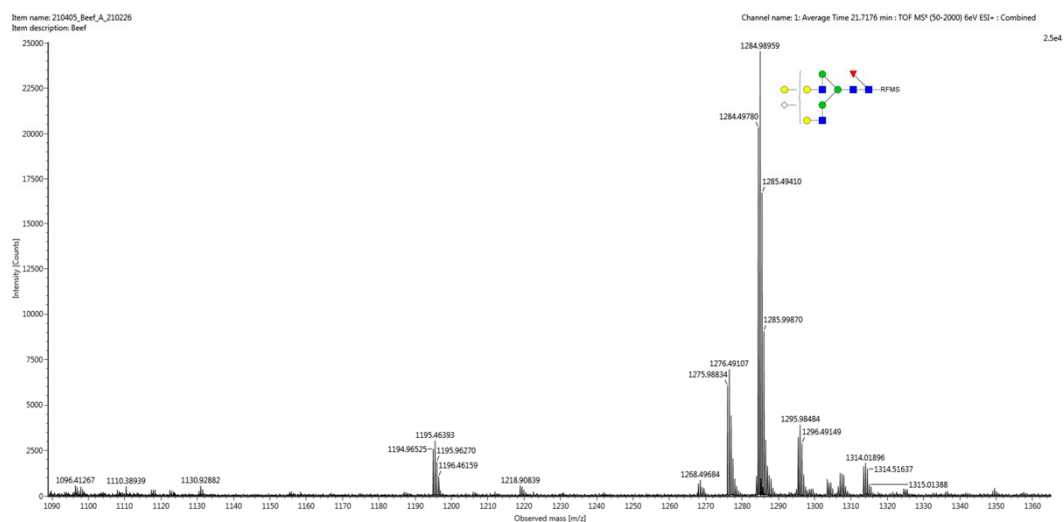

**Figure S51.** Beef: HexNAc(4)Hex(6)Fuc(1)NeuGC(1) 4.2 ± 0.4%, 21.76 min.

Beef: HexNAc(4)Hex(5)Fuc(1)NeuAc(1)NeuGc(1)  
2.2±1.0% @ 21.86min

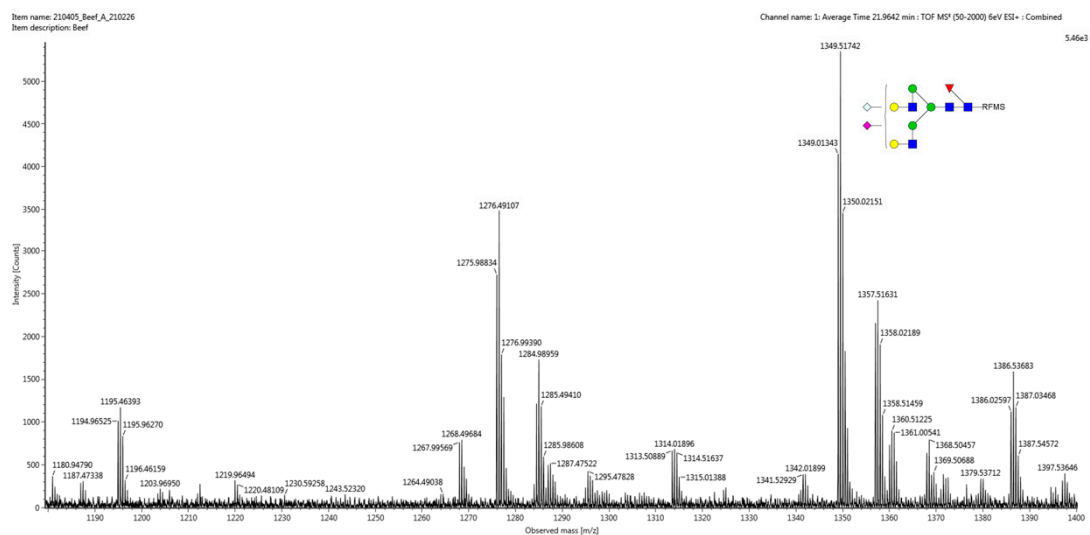

Figure S52. Beef: HexNAc(4)Hex(5)NeuAc(1)NeuGC(1) 2.2 ± 1.0%, 21.86 min.

Beef: HexNAc(4)Hex(5)NeuGc(2)  
5.8±0.4% @ 22.5min

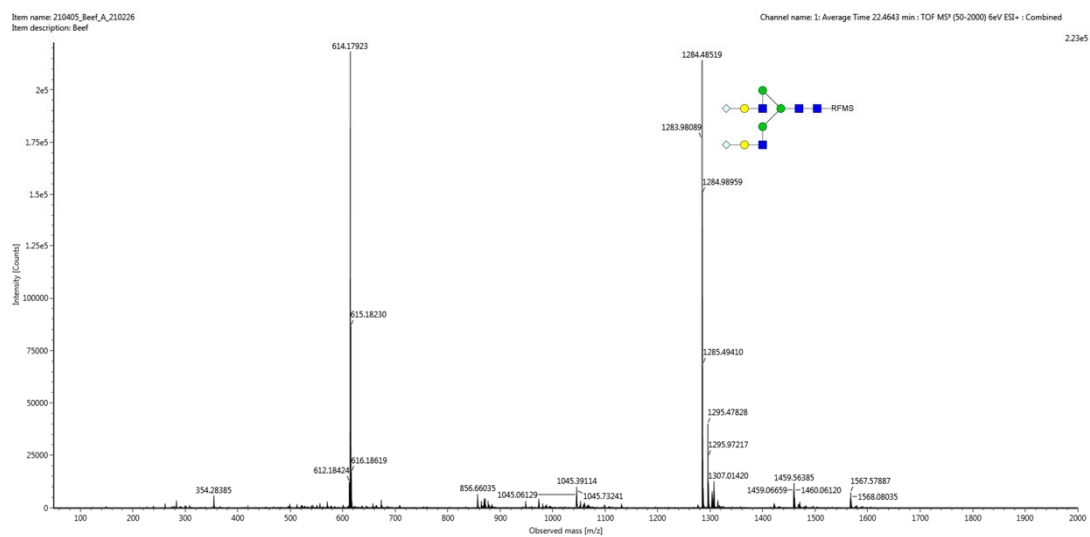

**Figure S53.** Beef: HexNAc(4)Hex(5)NeuGC(2) 5.8 ± 0.4%, 22.5 min.

Beef: HexNAc(4)Hex(5)Fuc(1)NeuGc(1)  
2.5±1.0% @ 23min

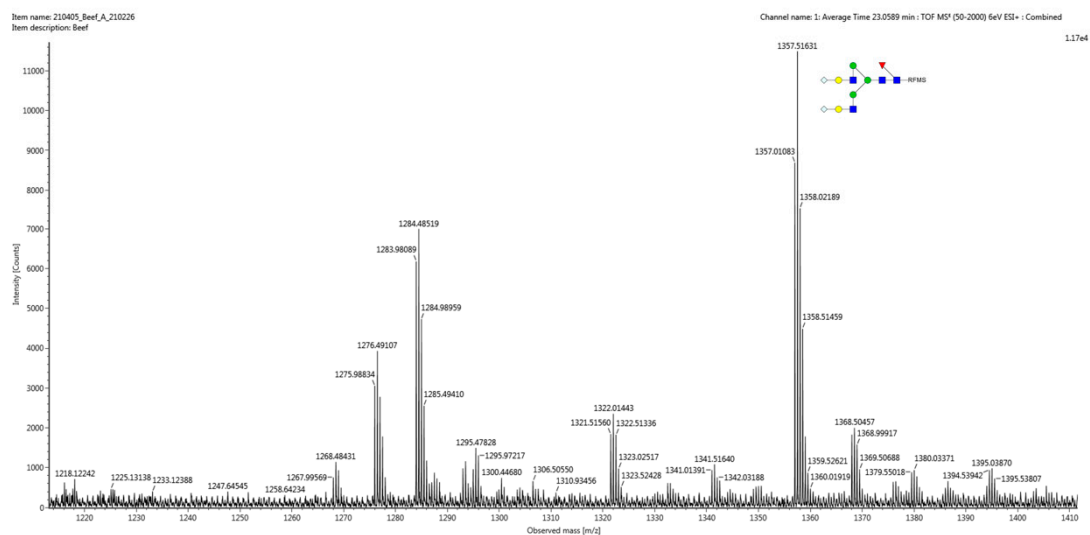

**Figure S54.** Beef: HexNAc(4)Hex(5)Fuc(1)NeuGC(1) 2.5 ± 1.0%, 23 min.
